# Supplementary material for: Phenotyping 172 strawberry genotypes for water soaking reveals a close relationship with skin water permeance
Source: PeerJ. 2024 Aug 29;12:e17960. doi: 10.7717/peerj.17960 (PMC11366227; doi:10.7717/peerj.17960)
Supplement: Supplemental Information 1 [file peerj-12-17960-s001.xlsx]

## Sheet: Fig 1
time (h)	WS (rating)	se	Time	Sc-Model			F2		Species		cultivar-2022		cultivar-2023					cultivar-2022		Species		F2		cultivar-2023
0	0	0	0	0.0218296		time (h)	WS (rating)	se	WS (rating)	se	WS (rating)	se	WS (rating)	se			time (h)	Uptake (mg)	se	Uptake (mg)	se	Uptake (mg)	se	Uptake (mg)	se
2	1.04	0.04	0.1	0.0305744		0	0	0	0	0	0	0	0	0			0	0	0	0	0	0	0	0	0
4	1.9558	0.05	0.2	0.0418399		2	0.8063	0.04	1.3987	0.127	1.26935	0.07	0.76	0.07			2	431.23	24.62	99.5801	10.72	105.98	4.42	442.73	39.66
6	2.6773	0.05	0.3	0.0560318		4	1.7615	0.07	2.4368	0.1543	2.14551	0.08	1.54	0.1			4	652.35	31.96	160.682	14.84	183.74	8.47	716.04	59.61
			0.4	0.0735425		6	2.6222	0.07	3.0251	0.1456	2.76161	0.09	2.26	0.12			6	833.29	39.77	202.227	17.25	255.11	10.87	969.22	77.19
			0.5	0.0947336
			0.6	0.11992
			0.7	0.149357
			0.8	0.183227
			0.9	0.221634
			1	0.2646
			1.1	0.312061
			1.2	0.363875
			1.3	0.419825
			1.4	0.479627
			1.5	0.542943
			1.6	0.609388
			1.7	0.678545
			1.8	0.749974
			1.9	0.823226
			2	0.897848
			2.1	0.973396
			2.2	1.04944
			2.3	1.12558
			2.4	1.20143
			2.5	1.27664
			2.6	1.3509
			2.7	1.42392
			2.8	1.49545
			2.9	1.56528
			3	1.63322
			3.1	1.69913
			3.2	1.76289
			3.3	1.8244
			3.4	1.88361
			3.5	1.94046
			3.6	1.99493
			3.7	2.04702
			3.8	2.09675
			3.9	2.14414
			4	2.18922
			4.1	2.23205
			4.2	2.27268
			4.3	2.31117
			4.4	2.3476
			4.5	2.38203
			4.6	2.41455
			4.7	2.44522
			4.8	2.47413
			4.9	2.50136
			5	2.52698
			5.1	2.55107
			5.2	2.5737
			5.3	2.59496
			5.4	2.61491
			5.5	2.63362
			5.6	2.65116
			5.7	2.6676
			5.8	2.683
			5.9	2.69742
			6	2.71091

## Sheet: Fig 2
	Frequency (%)						Frequency (%)						Frequency (%)
WS(rating)	cultivar-2023	cultivar-2022	Species-2022	F2-2022		Time lag (h)	cultivar-2023	cultivar-2022	Species-2022	F2-2022		U(rating/h)	cultivar-2023	cultivar-2022	Species-2022	F2-2022
0	6.2	4.7	5	9.1		0.13	59.3	70.1	64.1	51.7		0.3	56	14.5	8.1	9.3
1	49.5	20.4	16.3	27.3		1.88	33.6	19.2	24.1	24.2		0.9	37.8	37.7	29.4	46.4
2	30.3	39.5	24.7	44.5		3.63	1.3	6	6.9	15.4		1.5	2	24.2	30.3	27.5
3	11.7	25.9	38.8	16.6		5.38	5.2	3.9	4.4	6.8		2.1	0.7	23.6	30	16.8
4	2.3	9.4	15.3	2.5		7.13	0.7	0.8	0.6	2		2.7	3.6	0	2.2	0

## Sheet: Fig 3
Collection	surface area (cm2)	SE	Rate of uptake (mg/h)	SE	Flux x -10^6 (kg m-2 s-1)	SE		permeance x 10^-7(m/s)	Fre%	log permeance	Fre%		cultivars-2022		Species-2022		F2-2022		Cultivars-2023			Collection	Log permermeance	SE	WS (rating)	SE
cultivars-2022	19.1209	0.984997	128.905	15.7365	18.9129	2.41124		7	31.5	-6.78	0		Log Permeance	Cum. Freq. %	Log Permeance	Cum. Freq. %	Log Permeance	Cum. Freq. %	Log Permeance	Cum. Freq. %		cultivars-2022	-5.64163	0.0614202	2.1	0.314466
cultivars-2022	22.7246	1.03958	75.148	9.99325	9.17438	1.14399		21	39.7	-6.63	0.1		-6.334	0.2	-6.586	0.313	-6.683	0.132	-6.41	0.326		cultivars-2022	-5.92947	0.0525315	1.3	0.213437
cultivars-2022	31.7436	2.40464	186.419	32.6259	15.5212	1.90605		35	17.9	-6.48	0.4		-6.322	0.3	-6.523	0.625	-6.549	0.265	-6.335	0.651		cultivars-2022	-5.5749	0.0544307	2.4	0.221108
cultivars-2022	30.6546	1.16057	341.242	43.6814	30.9933	3.84255		49	6.1	-6.33	1.7		-6.315	0.5	-6.444	0.938	-6.523	0.397	-6.247	0.977		cultivars-2022	-5.29884	0.0530609	3.2	0.249444
cultivars-2022	24.2907	0.978274	104.8	16.6758	11.6165	1.5358		63	3.5	-6.18	5.8		-6.291	0.6	-6.401	1.25	-6.444	0.53	-6.193	1.303		cultivars-2022	-5.84197	0.0519997	2.4	0.163299
cultivars-2022	19.005	0.39217	197.025	27.6081	28.6173	3.72222		777	1	-6.03	12.4		-6.231	0.8	-6.358	1.563	-6.404	0.662	-6.187	1.629		cultivars-2022	-5.45808	0.0851293	2.5	0.268742
cultivars-2022	20.9698	1.53885	137.248	16.8213	17.8139	1.18212		91	0.2	-5.88	17.7		-6.23	0.9	-6.354	1.875	-6.388	0.795	-6.18	1.954		cultivars-2022	-5.46261	0.0280602	1.55556	0.175682
cultivars-2022	24.78	1.76388	158.885	28.2891	17.8633	2.85316		105	0	-5.73	20.5		-6.227	1.1	-6.347	2.188	-6.361	0.927	-6.178	2.28		cultivars-2022	-5.61003	0.0801243	2.2	0.326599
cultivars-2022	25.7456	1.72625	65.7215	8.44501	6.91966	0.58854		119	0	-5.58	18.8		-6.217	1.3	-6.345	2.5	-6.344	1.06	-6.166	2.606		cultivars-2022	-5.93669	0.0355369	1.2	0.2
cultivars-2022	30.6116	0.54953	327.173	29.9529	29.4745	2.48673		133	0	-5.43	13.2		-6.2	1.4	-6.321	2.813	-6.329	1.192	-6.163	2.932		cultivars-2022	-5.36692	0.0544854	3	0.298142
cultivars-2022	28.8366	1.92529	112.877	23.4362	10.5495	2.03487		147	0	-5.28	6.9		-6.192	1.6	-6.31	3.125	-6.317	1.325	-6.153	3.257		cultivars-2022	-5.90353	0.0651313	1.9	0.1
cultivars-2022	37.2628	1.26107	216.327	31.7101	15.834	2.05819				-5.13	2.3		-6.19	1.7	-6.282	3.438	-6.306	1.457	-6.144	3.583		cultivars-2022	-5.69866	0.0476825	1.8	0.290593
cultivars-2022	28.1721	1.31557	160.042	20.193	16.0944	2.16198				-4.98	0.1		-6.186	1.9	-6.264	3.75	-6.298	1.589	-6.139	3.909		cultivars-2022	-5.65302	0.0780232	1.8	0.133333
cultivars-2022	34.5231	1.52043	205.147	40.0203	16.1601	3.02926				-4.83	0		-6.183	2	-6.256	4.063	-6.292	1.722	-6.118	4.235		cultivars-2022	-5.77939	0.0831284	2.1	0.314466
cultivars-2022	29.3592	1.77752	274.082	62.1258	25.7446	5.45116							-6.176	2.2	-6.255	4.375	-6.291	1.854	-6.113	4.56		cultivars-2022	-5.50956	0.106727	2.11111	0.454742
cultivars-2022	27.3242	0.997345	214.827	29.9158	22.0478	3.30399							-6.17	2.4	-6.248	4.688	-6.285	1.987	-6.075	4.886		cultivars-2022	-5.54719	0.0842818	2.4	0.266667
cultivars-2022	41.3212	1.21349	219.219	29.8575	14.5059	1.72967							-6.17	2.5	-6.248	5	-6.284	2.119	-6.072	5.212		cultivars-2022	-5.61737	0.0684922	2.1	0.233333
cultivars-2022	30.3796	2.08779	230.388	51.0505	19.6727	3.8691							-6.167	2.7	-6.245	5.313	-6.279	2.252	-6.066	5.537		cultivars-2022	-5.67055	0.0923844	1.7	0.213437
cultivars-2022	28.6972	0.63083	183.19	27.7464	17.5829	2.48594							-6.166	2.8	-6.242	5.625	-6.274	2.384	-6.051	5.863		cultivars-2022	-5.6726	0.0581255	2	0.258199
cultivars-2022	27.8072	0.632555	93.7215	9.66408	9.34426	0.90918							-6.153	3	-6.217	5.938	-6.272	2.517	-6.046	6.189		cultivars-2022	-5.91791	0.0419447	0.5	0.166667
cultivars-2022	26.785	1.0261	189.778	33.0805	19.0563	2.7666							-6.143	3.1	-6.214	6.25	-6.266	2.649	-6.038	6.515		cultivars-2022	-5.56478	0.0665196	2.1	0.233333
cultivars-2022	30.3697	0.956264	192.516	23.3717	17.7781	2.22151							-6.14	3.3	-6.205	6.563	-6.265	2.781	-6.029	6.84		cultivars-2022	-5.58005	0.0614436	2	0.210819
cultivars-2022	28.9062	1.12633	146.307	21.8612	13.7244	1.72984							-6.137	3.5	-6.194	6.875	-6.265	2.914	-6.022	7.166		cultivars-2022	-5.55926	0.05161	3.2	0.290593
cultivars-2022	18.4146	0.650257	91.749	21.8678	13.4064	2.85821							-6.132	3.6	-6.185	7.188	-6.261	3.046	-6.021	7.492		cultivars-2022	-5.7224	0.0983284	2.1	0.233333
cultivars-2022	35.0889	1.52739	205.681	24.4152	16.0243	1.56379							-6.127	3.8	-6.182	7.5	-6.257	3.179	-6.018	7.818		cultivars-2022	-5.5674	0.0379951	2.8	0.249444
cultivars-2022	21.1639	0.988473	68.675	6.07255	8.97868	0.568664							-6.124	3.9	-6.171	7.813	-6.257	3.311	-6.015	8.143		cultivars-2022	-5.77957	0.0325509	1.9	0.1
cultivars-2022	26.5192	0.974978	198.768	24.5154	20.9174	2.69246							-6.118	4.1	-6.166	8.125	-6.247	3.444	-6.015	8.469		cultivars-2022	-5.38043	0.0788946	2.7	0.152753
cultivars-2022	25.5396	0.74194	105.356	24.3809	11.2565	2.53199							-6.116	4.2	-6.162	8.438	-6.244	3.576	-6.014	8.795		cultivars-2022	-5.85838	0.106747	1.9	0.276887
cultivars-2022	30.4034	1.2549	160.438	22.1968	14.3955	1.58804							-6.111	4.4	-6.161	8.75	-6.239	3.709	-6.014	9.121		cultivars-2022	-5.5991	0.0601513	2.4	0.305505
cultivars-2022	25.0684	0.756586	112.388	10.4165	12.7131	1.35847							-6.109	4.6	-6.161	9.063	-6.236	3.841	-6.008	9.446		cultivars-2022	-5.74162	0.0571357	2.3	0.213437
cultivars-2022	33.9433	1.19647	237.211	36.8467	19.0742	2.66289							-6.108	4.7	-6.156	9.375	-6.23	3.974	-6.001	9.772		cultivars-2022	-5.40724	0.0649341	2.7	0.260342
cultivars-2022	24.7009	1.41316	122.215	15.5481	14.0403	1.72438							-6.107	4.9	-6.13	9.688	-6.228	4.106	-5.997	10.098		cultivars-2022	-5.76232	0.0625399	2.4	0.163299
cultivars-2022	20.5127	0.895087	335.485	24.2731	45.0678	1.88764							-6.101	5	-6.125	10	-6.226	4.238	-5.985	10.423		cultivars-2022	-5.22104	0.0351141	4	0
cultivars-2022	21.7375	1.27796	222.41	28.3694	28.4232	3.4457							-6.098	5.2	-6.119	10.313	-6.218	4.371	-5.984	10.749		cultivars-2022	-5.36974	0.0557669	4	0
cultivars-2022	30.5589	1.53847	102.049	13.2925	9.41685	1.25558							-6.094	5.3	-6.112	10.625	-6.206	4.503	-5.983	11.075		cultivars-2022	-5.79443	0.0594543	1.4	0.163299
cultivars-2022	33.0314	1.77509	154.279	17.5539	12.8602	1.15778							-6.092	5.5	-6.106	10.938	-6.205	4.636	-5.981	11.401		cultivars-2022	-5.60592	0.0488544	2	0.210819
cultivars-2022	26.6805	1.00631	93.4005	21.3046	9.92529	2.48001							-6.092	5.7	-6.096	11.25	-6.205	4.768	-5.979	11.726		cultivars-2022	-5.84628	0.106078	1.7	0.3
cultivars-2022	25.837	1.99484	142.867	23.4836	15.7167	2.48649							-6.088	5.8	-6.095	11.563	-6.202	4.901	-5.978	12.052		cultivars-2022	-5.64064	0.0729815	2	0.210819
cultivars-2022	33.1067	1.38301	123.097	28.937	10.3246	2.17777							-6.087	6	-6.094	11.875	-6.199	5.033	-5.978	12.378		cultivars-2022	-5.80641	0.0656367	1	0.258199
cultivars-2022	33.9568	1.52661	140.314	19.0306	11.5067	1.35485							-6.072	6.1	-6.094	12.188	-6.194	5.166	-5.974	12.704		cultivars-2022	-5.60667	0.0641817	2.2	0.2
cultivars-2022	31.4694	1.61491	188.624	28.1018	16.4535	2.38671							-6.071	6.3	-6.093	12.5	-6.192	5.298	-5.969	13.029		cultivars-2022	-5.56343	0.0756466	2.3	0.213437
cultivars-2022	30.1494	1.49816	253.869	40.6208	23.6828	3.83334							-6.069	6.4	-6.089	12.813	-6.191	5.43	-5.967	13.355		cultivars-2022	-5.43072	0.106333	2.9	0.314466
cultivars-2022	26.8985	1.21879	188.762	22.7757	19.3359	1.76503							-6.069	6.6	-6.089	13.125	-6.187	5.563	-5.96	13.681		cultivars-2022	-5.54098	0.0505317	2.7	0.152753
cultivars-2022	24.6688	1.63677	168.602	31.1657	17.998	2.91757							-6.064	6.8	-6.086	13.438	-6.185	5.695	-5.959	14.007		cultivars-2022	-5.52711	0.101902	1.33333	0.372678
cultivars-2022	21.0044	1.27236	81.8145	10.0919	10.584	0.800159							-6.064	6.9	-6.081	13.75	-6.185	5.828	-5.957	14.332		cultivars-2022	-5.78311	0.0262063	1.7	0.213437
cultivars-2022	37.8373	1.49126	289.746	37.7406	21.4089	3.02817							-6.064	7.1	-6.077	14.063	-6.182	5.96	-5.945	14.658		cultivars-2022	-5.38652	0.0507167	2.7	0.260342
cultivars-2022	18.7566	0.664396	134.866	14.8045	19.6986	1.87917							-6.063	7.2	-6.072	14.375	-6.181	6.093	-5.937	14.984		cultivars-2022	-5.55827	0.0508666	3.1	0.233333
cultivars-2022	15.2749	1.14651	78.3035	8.7404	14.0108	0.856593							-6.059	7.4	-6.064	14.688	-6.175	6.225	-5.924	15.309		cultivars-2022	-5.68573	0.0430141	2.8	0.2
cultivars-2022	33.5395	1.39787	176.387	29.2606	14.2626	2.10468							-6.054	7.5	-6.057	15	-6.175	6.358	-5.91	15.635		cultivars-2022	-5.78266	0.0823069	2.1	0.233333
cultivars-2022	34.6008	1.50154	244.77	49.2649	19.9799	4.03941							-6.052	7.7	-6.055	15.313	-6.175	6.49	-5.91	15.961		cultivars-2022	-5.66002	0.108614	2	0.365148
cultivars-2022	29.4206	1.00259	158.25	24.6224	14.5822	2.00429							-6.051	7.9	-6.048	15.625	-6.167	6.623	-5.909	16.287		cultivars-2022	-5.65977	0.0431592	2	0.333333
cultivars-2022	25.4147	0.965366	136.464	35.4177	14.1613	3.46275							-6.047	8	-6.039	15.938	-6.166	6.755	-5.906	16.612		cultivars-2022	-5.7945	0.117923	1.5	0.428174
cultivars-2022	31.0847	1.07102	176.556	28.0459	15.3877	2.10425							-6.046	8.2	-6.039	16.25	-6.165	6.887	-5.903	16.938		cultivars-2022	-5.58547	0.0617633	2.2	0.38873
cultivars-2022	27.0188	1.39159	225.287	27.3977	22.6135	2.06339							-6.044	8.3	-6.035	16.563	-6.162	7.02	-5.899	17.264		cultivars-2022	-5.48169	0.0496091	3.2	0.290593
cultivars-2022	27.2966	1.06206	81.3	14.0905	8.08344	1.17894							-6.041	8.5	-6.032	16.875	-6.158	7.152	-5.897	17.59		cultivars-2022	-5.88821	0.0722282	1.9	0.276887
cultivars-2022	34.2998	1.03756	68.2044	6.40508	5.46429	0.3998							-6.039	8.6	-6.03	17.188	-6.158	7.285	-5.891	17.915		cultivars-2022	-6.00258	0.0268615	0.888889	0.111111
cultivars-2022	26.3392	1.19266	107.652	12.5273	11.1277	0.891037							-6.036	8.8	-6.023	17.5	-6.157	7.417	-5.889	18.241		cultivars-2022	-5.69821	0.037427	1.4	0.163299
cultivars-2022	33.6885	1.04478	205.415	59.3367	15.9486	4.24972							-6.029	9	-6.021	17.813	-6.156	7.55	-5.883	18.567		cultivars-2022	-5.78616	0.113818	0.9	0.233333
cultivars-2022	23.4068	1.66939	236.209	44.6312	26.6395	3.83025							-6.021	9.1	-6.02	18.125	-6.152	7.682	-5.88	18.893		cultivars-2022	-5.45744	0.0932684	2.8	0.38873
cultivars-2022	29.938	0.872282	170.181	16.7288	15.7245	1.39914							-6.018	9.3	-6.015	18.438	-6.151	7.815	-5.878	19.218		cultivars-2022	-5.73919	0.043629	1.8	0.133333
cultivars-2022	25.9231	1.53073	128.399	23.059	14.249	2.57604							-6.014	9.4	-6.011	18.75	-6.147	7.947	-5.871	19.544		cultivars-2022	-5.82823	0.101062	1.4	0.305505
cultivars-2022	26.8785	1.29001	110.782	21.3602	10.9899	1.70692							-6.012	9.6	-6.01	19.063	-6.145	8.079	-5.871	19.87		cultivars-2022	-5.82142	0.065171	2.1	0.179505
cultivars-2022	29.1886	0.812519	99.3955	23.3025	9.49452	2.25619							-6.012	9.7	-6.008	19.375	-6.141	8.212	-5.87	20.195		cultivars-2022	-5.87082	0.0759796	1.9	0.179505
cultivars-2022	13.0256	0.740979	109.148	15.0864	22.8246	2.43055							-6.011	9.9	-5.997	19.688	-6.137	8.344	-5.867	20.521		cultivars-2022	-5.49763	0.044579	2.6	0.163299
F2-2022	9.69779	0.378779	73.3465	7.14079	21.2516	2.19383							-6.011	10.1	-5.996	20	-6.135	8.477	-5.865	20.847		F2-2022	-5.68032	0.0514953	2.3	0.213437
F2-2022	10.9486	0.781351	68.289	10.1998	16.6761	1.75153							-6.01	10.2	-5.994	20.313	-6.132	8.609	-5.858	21.173		F2-2022	-5.70761	0.0399564	1.3	0.3
F2-2022	9.99438	0.651793	118.843	15.3614	32.4303	2.94232							-6.007	10.4	-5.986	20.625	-6.131	8.742	-5.857	21.498		F2-2022	-5.34943	0.0537812	2.2	0.249444
F2-2022	7.37529	0.419081	35.9978	4.78105	13.1651	1.36192							-6.006	10.5	-5.983	20.938	-6.129	8.874	-5.857	21.824		F2-2022	-5.85619	0.0409152	0.444444	0.242161
F2-2022	7.24056	0.57385	34.021	3.3045	13.2556	1.30757							-6.005	10.7	-5.982	21.25	-6.128	9.007	-5.852	22.15		F2-2022	-5.83507	0.0589739	1.5	0.166667
F2-2022	7.98317	0.444497	53.5125	7.39078	18.1833	1.80796							-6.005	10.8	-5.98	21.563	-6.126	9.139	-5.851	22.476		F2-2022	-5.65855	0.0573542	1.6	0.266667
F2-2022	8.60058	0.353704	29.3865	4.01466	9.2677	0.992219							-6.005	11	-5.972	21.875	-6.126	9.272	-5.844	22.801		F2-2022	-5.93262	0.0385905	1.8	0.290593
F2-2022	9.69611	0.461474	35.974	3.66534	10.1653	0.690884							-6.001	11.2	-5.966	22.188	-6.124	9.404	-5.842	23.127		F2-2022	-5.95139	0.0291092	0.3	0.152753
F2-2022	9.43069	0.338242	36.7385	5.14846	10.74	1.41176							-5.996	11.3	-5.96	22.5	-6.123	9.536	-5.839	23.453		F2-2022	-6.02904	0.0526694	1.2	0.2
F2-2022	8.54432	0.240327	75.045	10.3374	24.3436	3.31455							-5.996	11.5	-5.954	22.813	-6.123	9.669	-5.838	23.779		F2-2022	-5.48495	0.062042	2.66667	0.235702
F2-2022	5.97135	0.419884	42.791	6.3393	19.0973	1.91089							-5.993	11.6	-5.951	23.125	-6.122	9.801	-5.835	24.104		F2-2022	-5.62969	0.0466572	1.9	0.179505
F2-2022	6.73273	0.394065	34.484	5.22413	14.3279	1.83884							-5.992	11.8	-5.949	23.438	-6.115	9.934	-5.834	24.43		F2-2022	-5.85747	0.0787432	1.8	0.326599
F2-2022	8.27547	0.627447	54.8385	4.79807	18.5658	0.982136							-5.992	11.9	-5.947	23.75	-6.113	10.066	-5.833	24.756		F2-2022	-5.67076	0.0324918	1.8	0.133333
F2-2022	12.0675	0.47651	37.973	5.50062	8.47564	0.901437							-5.99	12.1	-5.946	24.063	-6.11	10.199	-5.83	25.081		F2-2022	-5.99046	0.0584848	1.4	0.305505
F2-2022	8.35718	0.645443	45.3005	8.24141	14.2015	1.75205							-5.989	12.3	-5.945	24.375	-6.109	10.331	-5.826	25.407		F2-2022	-5.8475	0.0685147	1.6	0.266667
F2-2022	8.00121	0.523738	27.708	5.97146	9.0386	1.28983							-5.986	12.4	-5.943	24.688	-6.107	10.464	-5.825	25.733		F2-2022	-6.1145	0.0603254	1.4	0.266667
F2-2022	8.60799	0.943138	35.1545	3.97787	12.1747	1.64684							-5.986	12.6	-5.942	25	-6.101	10.596	-5.822	26.059		F2-2022	-5.9322	0.0770299	1.7	0.334996
F2-2022	7.52381	0.683634	29.7365	6.05221	10.4707	1.17984							-5.985	12.7	-5.932	25.313	-6.1	10.728	-5.822	26.384		F2-2022	-5.76666	0.0399994	1.9	0.233333
F2-2022	7.28756	0.713139	46.95	6.9842	17.7126	1.17091							-5.985	12.9	-5.912	25.625	-6.1	10.861	-5.821	26.71		F2-2022	-5.58549	0.0391661	3.2	0.249444
F2-2022	8.02291	0.228112	21.8064	2.53582	7.59082	0.867096							-5.984	13.1	-5.91	25.938	-6.099	10.993	-5.82	27.036		F2-2022	-6.05194	0.0363828	1.2	0.249444
F2-2022	9.32598	0.818553	80.3176	14.6915	22.7755	2.79258							-5.984	13.2	-5.909	26.25	-6.098	11.126	-5.818	27.362		F2-2022	-5.60653	0.0527313	1.8	0.249444
F2-2022	10.3999	0.532077	67.2256	12.8016	17.2478	3.06453							-5.982	13.4	-5.906	26.563	-6.097	11.258	-5.815	27.687		F2-2022	-5.78735	0.0872015	2.3	0.3
F2-2022	11.3277	0.749345	64.7983	4.83958	16.0597	0.970341							-5.979	13.5	-5.903	26.875	-6.096	11.391	-5.811	28.013		F2-2022	-5.68867	0.0334051	1.77778	0.277778
F2-2022	6.99163	0.577429	17.9085	1.72776	7.27197	0.648886							-5.978	13.7	-5.894	27.188	-6.094	11.523	-5.808	28.339		F2-2022	-6.13952	0.0401217	2	0.149071
F2-2022	15.4854	0.832409	63.5365	8.91148	11.0106	1.1352							-5.974	13.8	-5.894	27.5	-6.093	11.656	-5.804	28.664		F2-2022	-5.90422	0.0558396	1.7	0.152753
F2-2022	13.0302	0.850809	68.8085	5.74699	14.6918	0.914096							-5.972	14	-5.89	27.813	-6.091	11.788	-5.801	28.99		F2-2022	-5.72242	0.0318924	2.2	0.2
F2-2022	9.22899	0.61383	51.2565	5.34279	15.6585	1.62084							-5.972	14.2	-5.885	28.125	-6.091	11.921	-5.797	29.316		F2-2022	-5.80292	0.0440937	1.9	0.179505
F2-2022	10.2983	0.552404	47.2815	3.63491	12.8594	0.829448							-5.967	14.3	-5.881	28.438	-6.087	12.053	-5.795	29.642		F2-2022	-5.94435	0.0313259	1.4	0.221108
F2-2022	10.319	0.383771	42.8105	5.9785	11.6074	1.63151							-5.967	14.5	-5.881	28.75	-6.086	12.185	-5.794	29.967		F2-2022	-6.02748	0.0840848	1.8	0.290593
F2-2022	6.10417	0.472566	38.015	3.75155	17.1003	1.05854							-5.964	14.6	-5.876	29.063	-6.083	12.318	-5.79	30.293		F2-2022	-5.63249	0.0185394	1.9	0.378594
F2-2022	8.84	0.431054	34.65	4.41872	10.7269	1.14315							-5.964	14.8	-5.875	29.375	-6.083	12.45	-5.79	30.619		F2-2022	-6.01377	0.0456386	2	0.258199
F2-2022	7.12492	0.367138	53.0935	5.82735	20.5436	1.83767							-5.963	14.9	-5.873	29.688	-6.082	12.583	-5.783	30.945		F2-2022	-5.57581	0.0541565	2.9	0.179505
F2-2022	7.81188	0.306226	19.6735	2.98756	6.87182	1.03736							-5.961	15.1	-5.873	30	-6.079	12.715	-5.782	31.27		F2-2022	-6.16439	0.0721952	1.3	0.334996
F2-2022	9.63182	0.365275	50.126	4.91308	14.3592	1.27209							-5.956	15.3	-5.862	30.313	-6.078	12.848	-5.779	31.596		F2-2022	-5.81703	0.0390101	1.8	0.249444
F2-2022	8.57749	0.103424	48.1495	3.71418	15.5424	1.11099							-5.955	15.4	-5.861	30.625	-6.076	12.98	-5.779	31.922		F2-2022	-5.75274	0.0390431	2.2	0.133333
F2-2022	8.7679	0.878109	33.6835	2.7244	11.3938	1.16748							-5.951	15.6	-5.854	30.938	-6.075	13.113	-5.779	32.248		F2-2022	-5.86525	0.0791891	2.1	0.233333
F2-2022	7.75952	0.472193	30.3685	2.65324	10.9327	0.744015							-5.95	15.7	-5.853	31.25	-6.075	13.245	-5.778	32.573		F2-2022	-5.83695	0.0388482	1.8	0.133333
F2-2022	12.1027	0.471622	34.2805	2.39896	7.97836	0.714743							-5.949	15.9	-5.846	31.563	-6.075	13.377	-5.776	32.899		F2-2022	-6.0437	0.0241045	1.3	0.213437
F2-2022	8.26068	0.318191	70.19	6.16664	23.4387	1.59663							-5.947	16	-5.842	31.875	-6.074	13.51	-5.774	33.225		F2-2022	-5.57849	0.0475407	2.5	0.223607
F2-2022	9.01609	0.509313	83.5019	10.1145	25.7704	2.8098							-5.943	16.2	-5.841	32.188	-6.074	13.642	-5.772	33.55		F2-2022	-5.57508	0.0545332	3.1	0.1
F2-2022	9.04343	0.447574	38.596	3.87329	11.7361	0.941168							-5.939	16.4	-5.839	32.5	-6.071	13.775	-5.771	33.876		F2-2022	-5.98222	0.0434845	1.7	0.152753
F2-2022	9.37075	0.674095	59.1175	9.82597	16.8825	2.05194							-5.933	16.5	-5.837	32.813	-6.07	13.907	-5.768	34.202		F2-2022	-5.87849	0.0678086	2.1	0.276887
F2-2022	8.55501	1.46451	33.943	8.65036	11.2635	1.57071							-5.933	16.7	-5.836	33.125	-6.069	14.04	-5.767	34.528		F2-2022	-5.85966	0.091527	1.5	0.307318
F2-2022	11.3364	0.944289	53.379	5.36317	13.6447	1.48217							-5.933	16.8	-5.836	33.438	-6.061	14.172	-5.764	34.853		F2-2022	-5.84202	0.0597599	1.9	0.179505
F2-2022	8.52387	0.385059	33.375	4.15127	10.6593	1.06921							-5.925	17	-5.832	33.75	-6.061	14.305	-5.764	35.179		F2-2022	-5.95291	0.0438845	1.22222	0.364302
F2-2022	8.24093	0.477468	49.076	5.00172	16.6864	1.64068							-5.922	17.1	-5.827	34.063	-6.061	14.437	-5.763	35.505		F2-2022	-5.63643	0.0389459	2.3	0.152753
F2-2022	7.55952	0.375386	39.926	8.51162	13.976	2.26613							-5.921	17.3	-5.823	34.375	-6.061	14.57	-5.763	35.831		F2-2022	-5.79987	0.0717873	1.5	0.268742
F2-2022	9.13238	0.585007	61.013	8.19108	18.4528	2.14736							-5.92	17.5	-5.818	34.688	-6.058	14.702	-5.761	36.156		F2-2022	-5.70018	0.0737746	1.9	0.276887
F2-2022	6.18559	0.113559	30.698	1.76399	13.7402	0.674642							-5.918	17.6	-5.815	35	-6.055	14.834	-5.761	36.482		F2-2022	-5.76743	0.0250162	1	0.210819
F2-2022	6.99713	0.274781	47.674	6.912	18.6119	2.18022							-5.918	17.8	-5.814	35.313	-6.054	14.967	-5.758	36.808		F2-2022	-5.7285	0.0564498	1.7	0.260342
F2-2022	8.37584	0.666426	40.612	4.03807	13.6734	1.23567							-5.917	17.9	-5.807	35.625	-6.054	15.099	-5.757	37.134		F2-2022	-5.88595	0.052845	2	0.210819
F2-2022	6.82185	0.632945	50.9535	11.9237	18.8202	2.57485							-5.914	18.1	-5.805	35.938	-6.054	15.232	-5.754	37.459		F2-2022	-5.52633	0.0423159	1.6	0.266667
F2-2022	8.06597	0.697589	61.4185	9.33073	20.6844	2.34271							-5.912	18.2	-5.802	36.25	-6.052	15.364	-5.751	37.785		F2-2022	-5.59699	0.047946	2.1	0.179505
F2-2022	7.21312	0.590239	31.002	6.57167	10.9671	1.45315							-5.912	18.4	-5.8	36.563	-6.052	15.497	-5.751	38.111		F2-2022	-6.0007	0.0654878	1.7	0.334996
F2-2022	8.7857	0.321187	40.073	4.06355	12.5293	1.00994							-5.908	18.6	-5.796	36.875	-6.05	15.629	-5.75	38.436		F2-2022	-5.88033	0.04078	0.9	0.233333
F2-2022	9.1718	0.579155	57.6715	9.54662	16.5248	1.75138							-5.907	18.7	-5.791	37.188	-6.049	15.762	-5.749	38.762		F2-2022	-5.72478	0.0364546	2.4	0.221108
F2-2022	8.64422	0.296744	116.787	11.56	37.0212	2.93922							-5.904	18.9	-5.789	37.5	-6.049	15.894	-5.748	39.088		F2-2022	-5.30973	0.0487794	2.4	0.339935
F2-2022	10.4173	0.533846	61.733	4.73687	16.5864	1.0835							-5.904	19	-5.786	37.813	-6.047	16.026	-5.745	39.414		F2-2022	-5.71432	0.0427569	2.1	0.233333
F2-2022	8.94578	0.906317	22.3985	3.28997	6.98553	0.884699							-5.903	19.2	-5.784	38.125	-6.046	16.159	-5.744	39.739		F2-2022	-6.12419	0.065079	1.5	0.268742
F2-2022	6.32574	0.349314	24.254	3.21542	10.5053	1.12469							-5.903	19.3	-5.784	38.438	-6.045	16.291	-5.744	40.065		F2-2022	-5.83657	0.050969	1.6	0.266667
F2-2022	6.7734	0.337432	47.773	5.85962	19.3384	2.11631							-5.901	19.5	-5.783	38.75	-6.043	16.424	-5.742	40.391		F2-2022	-5.63138	0.0634925	1.3	0.260342
F2-2022	9.40385	0.397029	56.2495	8.26168	16.2368	1.93835							-5.9	19.7	-5.782	39.063	-6.042	16.556	-5.74	40.717		F2-2022	-5.79479	0.0530146	1.2	0.133333
F2-2022	6.80422	0.450191	34.863	4.4622	13.8556	1.16097							-5.9	19.8	-5.776	39.375	-6.042	16.689	-5.74	41.042		F2-2022	-5.76999	0.0332023	1.4	0.221108
F2-2022	9.94994	0.508037	55.9115	9.67395	14.987	1.91087							-5.898	20	-5.775	39.688	-6.037	16.821	-5.737	41.368		F2-2022	-5.77941	0.0659193	1.7	0.260342
F2-2022	6.96796	0.289068	22.2705	1.13089	8.95956	0.459462							-5.898	20.1	-5.773	40	-6.035	16.954	-5.733	41.694		F2-2022	-5.96176	0.0279495	1.1	0.179505
F2-2022	7.91107	0.470312	42.7385	5.99225	14.639	1.30258							-5.898	20.3	-5.77	40.313	-6.034	17.086	-5.727	42.02		F2-2022	-5.73379	0.0386661	2.4	0.163299
F2-2022	4.31377	0.217399	38.4295	4.98043	24.8296	3.18262							-5.897	20.4	-5.769	40.625	-6.032	17.219	-5.721	42.345		F2-2022	-5.54268	0.0492816	2.6	0.221108
F2-2022	7.1029	0.619962	37.1175	3.56147	15.6733	1.97626							-5.89	20.6	-5.767	40.938	-6.03	17.351	-5.721	42.671		F2-2022	-5.78538	0.0548479	1.2	0.2
F2-2022	6.35881	0.267041	56.0895	9.71525	24.0546	3.57783							-5.89	20.8	-5.765	41.25	-6.029	17.483	-5.716	42.997		F2-2022	-5.5293	0.054638	1.8	0.249444
F2-2022	6.7329	0.564224	42.646	8.94725	16.2165	2.3961							-5.89	20.9	-5.762	41.563	-6.027	17.616	-5.716	43.322		F2-2022	-5.85009	0.0705205	1.5	0.223607
F2-2022	6.65048	0.697737	36.0915	6.11591	14.6354	1.58209							-5.888	21.1	-5.762	41.875	-6.027	17.748	-5.715	43.648		F2-2022	-5.78368	0.0606691	1.1	0.276887
F2-2022	6.47552	0.497114	25.21	3.29383	10.8367	1.24829							-5.886	21.2	-5.76	42.188	-6.025	17.881	-5.715	43.974		F2-2022	-5.93451	0.0699666	1	0.149071
F2-2022	10.923	0.415778	45.2085	6.10425	11.2558	1.30943							-5.885	21.4	-5.756	42.5	-6.025	18.013	-5.711	44.3		F2-2022	-6.03432	0.0525469	1.2	0.249444
F2-2022	17.051	0.860772	65.288	12.99	10.3602	1.86534							-5.885	21.5	-5.755	42.813	-6.023	18.146	-5.708	44.625		F2-2022	-5.88733	0.0982151	1	0.298142
F2-2022	10.2044	0.697941	37.647	5.82887	9.99833	1.09478							-5.884	21.7	-5.755	43.125	-6.021	18.278	-5.705	44.951		F2-2022	-5.77103	0.0321447	1.6	0.221108
F2-2022	5.33549	0.175828	43.6378	5.1635	22.3691	1.951							-5.883	21.9	-5.754	43.438	-6.018	18.411	-5.702	45.277		F2-2022	-5.54164	0.0392198	3.66667	0.166667
wild	5.65623	0.141363	40.9565	3.84894	20.0544	1.80879							-5.882	22	-5.751	43.75	-6.017	18.543	-5.702	45.603		Species-2022	-5.71186	0.0485212	2	0.149071
wild	5.83458	0.172453	43.8085	3.95632	20.9021	1.76709							-5.881	22.2	-5.75	44.063	-6.017	18.675	-5.701	45.928		Species-2022	-5.57404	0.0395211	2.2	0.133333
wild	2.91884	0.0672082	42.595	2.17258	40.6961	2.16579							-5.88	22.3	-5.745	44.375	-6.015	18.808	-5.698	46.254		Species-2022	-5.25701	0.0351218	3.5	0.223607
wild	6.40769	0.163043	81.2735	13.2668	35.8685	6.5426							-5.878	22.5	-5.742	44.688	-6.015	18.94	-5.696	46.58		Species-2022	-5.33836	0.0872814	3.4	0.221108
wild	7.49449	0.257232	72.4985	8.05416	26.7007	2.84088							-5.877	22.6	-5.741	45	-6.011	19.073	-5.696	46.906		Species-2022	-5.52167	0.0666838	3	0.258199
wild	5.53548	0.250314	55.49	8.43564	27.0497	3.603							-5.876	22.8	-5.741	45.313	-6.007	19.205	-5.695	47.231		Species-2022	-5.55601	0.0771105	2.8	0.326599
wild	4.9968	0.242118	39.3005	3.72768	21.642	1.72071							-5.876	23	-5.74	45.625	-6.007	19.338	-5.695	47.557		Species-2022	-5.63167	0.0461712	3	0.210819
wild	4.53443	0.152715	40.575	7.51144	24.0002	3.67676							-5.873	23.1	-5.739	45.938	-6.003	19.47	-5.693	47.883		Species-2022	-5.66034	0.077873	2.6	0.163299
wild	4.84693	0.198438	61.501	5.50542	34.8722	2.3433							-5.872	23.3	-5.737	46.25	-6.003	19.603	-5.693	48.208		Species-2022	-5.37374	0.0483665	3.1	0.233333
wild	6.64127	0.385449	15.0545	1.12953	6.30595	0.351819							-5.872	23.4	-5.735	46.563	-6.003	19.735	-5.69	48.534		Species-2022	-6.26798	0.027095	0.7	0.152753
wild	7.25723	0.290094	20.0135	2.28938	7.60069	0.711358							-5.871	23.6	-5.734	46.875	-6.001	19.868	-5.688	48.86		Species-2022	-6.32869	0.0466038	0.6	0.221108
wild	5.69037	0.257696	26.889	2.25681	13.1156	0.924868							-5.871	23.7	-5.733	47.188	-5.999	20	-5.686	49.186		Species-2022	-6.03733	0.0333346	0.9	0.179505
wild	4.13969	0.177228	22.2475	1.28372	15.2284	1.21379							-5.871	23.9	-5.728	47.5	-5.997	20.132	-5.686	49.511		Species-2022	-5.89826	0.0326239	1.5	0.166667
wild	4.25995	0.158616	21.8815	3.93686	14.9622	3.05873							-5.869	24.1	-5.724	47.813	-5.997	20.265	-5.682	49.837		Species-2022	-5.84634	0.102927	1.5	0.307318
wild	3.71422	0.142907	33.752	0.954265	25.3861	0.589516							-5.868	24.2	-5.723	48.125	-5.996	20.397	-5.676	50.163		Species-2022	-5.39497	0.0248191	3.6	0.163299
wild	4.47319	0.275612	60.2107	7.10674	36.5279	2.8424							-5.866	24.4	-5.718	48.438	-5.996	20.53	-5.676	50.489		Species-2022	-5.23045	0.0395579	3.3	0.213437
wild	24.659	0.882646	101.847	20.2221	11.1719	1.69022							-5.866	24.5	-5.716	48.75	-5.994	20.662	-5.673	50.814		Species-2022	-5.91838	0.0554881	1	0.298142
wild	13.0035	0.963583	24.7064	2.33942	5.22771	0.224457							-5.865	24.7	-5.712	49.063	-5.993	20.795	-5.668	51.14		Species-2022	-6.15995	0.020995	1	0.13484
wild	8.06663	0.238218	46.5225	6.64943	15.8293	2.06501							-5.864	24.8	-5.709	49.375	-5.993	20.927	-5.668	51.466		Species-2022	-5.81766	0.0747887	2.6	0.163299
wild	8.872	0.682879	40.7455	9.26888	11.8389	1.53805							-5.863	25	-5.706	49.688	-5.991	21.06	-5.664	51.792		Species-2022	-5.82974	0.0535085	1.8	0.290593
wild	10.2552	0.530219	65.835	6.26693	17.822	1.58176							-5.862	25.2	-5.699	50	-5.991	21.192	-5.656	52.117		Species-2022	-5.50842	0.0458466	3	0.258199
wild	7.99558	0.49033	60.1265	8.28709	21.1501	2.62544							-5.861	25.3	-5.689	50.313	-5.991	21.325	-5.65	52.443		Species-2022	-5.65276	0.0772674	2.9	0.276887
wild	5.22963	0.392009	55.351	6.60326	28.9252	1.60714							-5.859	25.5	-5.688	50.625	-5.987	21.457	-5.649	52.769		Species-2022	-5.32419	0.0283002	3.2	0.2
wild	4.65836	0.220667	26.7525	2.16398	15.8254	0.613825							-5.857	25.6	-5.686	50.938	-5.986	21.589	-5.649	53.094		Species-2022	-5.70316	0.0198272	2.4	0.163299
wild	3.76899	0.214928	22.659	1.37762	17.0265	1.23446							-5.856	25.8	-5.679	51.25	-5.985	21.722	-5.648	53.42		Species-2022	-5.51196	0.0325636	3.1	0.179505
wild	7.14301	0.237391	38.6006	3.99964	14.9718	1.51823							-5.855	25.9	-5.679	51.563	-5.985	21.854	-5.647	53.746		Species-2022	-5.67951	0.0601833	2.77778	0.146986
wild	4.79913	0.265441	24.248	2.73848	13.9959	1.31556							-5.852	26.1	-5.676	51.875	-5.985	21.987	-5.647	54.072		Species-2022	-5.79679	0.0416618	2.2	0.2
wild	5.23468	0.282254	33.029	5.37516	16.8193	1.92444							-5.848	26.3	-5.671	52.188	-5.984	22.119	-5.647	54.397		Species-2022	-5.80343	0.0468734	2.9	0.276887
wild	5.05675	0.193619	27.32	3.61944	14.6768	1.52102							-5.848	26.4	-5.669	52.5	-5.984	22.252	-5.647	54.723		Species-2022	-5.80302	0.0513091	2.9	0.179505
wild	3.13827	0.131248	19.514	1.15275	17.2242	0.590182							-5.846	26.6	-5.662	52.813	-5.983	22.384	-5.644	55.049		Species-2022	-5.63053	0.0341559	3	0.210819
wild	4.2773	0.313411	30.6595	3.8591	20.2208	2.7217							-5.843	26.7	-5.65	53.125	-5.978	22.517	-5.644	55.375		Species-2022	-5.66793	0.0674979	2.4	0.305505
wild	5.34963	0.18675	21.6775	2.69981	11.0124	1.03987							-5.843	26.9	-5.648	53.438	-5.978	22.649	-5.643	55.7		Species-2022	-5.94358	0.0434295	3.1	0.179505
Cultivars-2023	19.7322	1.49574	99.1825	19.6005	13.7577	2.40126							-5.839	27	-5.648	53.75	-5.976	22.781	-5.641	56.026		cultivars-2023	-5.8114	0.0768866	1.5	0.327327
Cultivars-2023	30.6917	0.783269	319.179	31.0855	28.6482	2.58916							-5.839	27.2	-5.646	54.063	-5.975	22.914	-5.64	56.352		cultivars-2023	-5.41589	0.0532641	2.9	0.276887
Cultivars-2023	28.8425	0.807298	118.883	6.16715	11.506	0.626706							-5.837	27.4	-5.646	54.375	-5.974	23.046	-5.639	56.678		cultivars-2023	-5.62704	0.0255061	1.2	0.133333
Cultivars-2023	31.3691	0.713555	236.416	25.5605	20.8945	2.10221							-5.836	27.5	-5.644	54.688	-5.972	23.179	-5.637	57.003		cultivars-2023	-5.51482	0.0487885	1.8	0.249444
Cultivars-2023	32.1209	0.718968	167.609	22.8751	14.3965	1.92689							-5.836	27.7	-5.64	55	-5.971	23.311	-5.634	57.329		cultivars-2023	-5.64728	0.0731434	1.5	0.223607
Cultivars-2023	38.1002	1.07974	241.157	34.5799	17.599	2.43425							-5.835	27.8	-5.64	55.313	-5.97	23.444	-5.625	57.655		cultivars-2023	-5.66498	0.0737085	1.8	0.2
Cultivars-2023	33.0277	1.61976	234.989	20.1504	19.7393	1.28258							-5.834	28	-5.638	55.625	-5.969	23.576	-5.623	57.98		cultivars-2023	-5.54671	0.0315599	1.7	0.152753
Cultivars-2023	39.1582	0.929685	188.803	32.8376	13.3058	2.19112							-5.834	28.1	-5.638	55.938	-5.969	23.709	-5.62	58.306		cultivars-2023	-5.71758	0.0631491	1.4	0.221108
Cultivars-2023	29.2775	1.95955	275.285	58.8125	24.6891	4.04558							-5.832	28.3	-5.632	56.25	-5.969	23.841	-5.619	58.632		cultivars-2023	-5.57902	0.0797178	1.77778	0.277778
Cultivars-2023	35.7221	0.955032	114.133	10.424	8.88365	0.804555							-5.831	28.5	-5.623	56.563	-5.968	23.974	-5.616	58.958		cultivars-2023	-5.72585	0.0432341	0.8	0.2
Cultivars-2023	32.4144	0.891667	195.064	40.7975	16.9382	3.66665							-5.827	28.6	-5.623	56.875	-5.968	24.106	-5.614	59.283		cultivars-2023	-5.59149	0.0731359	1.2	0.249444
Cultivars-2023	36.44	0.849035	284.341	48.935	21.8583	3.84831							-5.824	28.8	-5.62	57.188	-5.967	24.238	-5.613	59.609		cultivars-2023	-5.61641	0.0952228	1.4	0.266667
Cultivars-2023	40.1886	1.1091	211.286	14.6625	14.555	0.901361							-5.824	28.9	-5.617	57.5	-5.966	24.371	-5.601	59.935		cultivars-2023	-5.75357	0.0243214	0.7	0.152753
Cultivars-2023	31.5196	0.668014	407.731	26.6958	35.8418	2.02382							-5.823	29.1	-5.611	57.813	-5.965	24.503	-5.6	60.261		cultivars-2023	-5.30211	0.0277882	2.8	0.2
Cultivars-2023	40.6373	1.65618	316.387	28.3107	21.6808	1.73026							-5.82	29.2	-5.607	58.125	-5.965	24.636	-5.598	60.586		cultivars-2023	-5.47882	0.0464161	2.3	0.213437
Cultivars-2023	32.4952	1.71351	126.275	10.8002	10.8366	0.843508							-5.817	29.4	-5.606	58.438	-5.965	24.768	-5.595	60.912		cultivars-2023	-5.70141	0.0190925	1.2	0.249444
Cultivars-2023	32.7496	1.45674	82.593	10.2082	6.89004	0.657317							-5.816	29.6	-5.599	58.75	-5.965	24.901	-5.595	61.238		cultivars-2023	-5.89271	0.0595376	1.2	0.133333
Cultivars-2023	23.4506	1.0437	178.696	15.845	21.2742	1.94129							-5.816	29.7	-5.589	59.063	-5.961	25.033	-5.595	61.564		cultivars-2023	-5.49874	0.0530155	2.9	0.314466
Cultivars-2023	29.9889	0.780211	87.721	7.91653	8.10619	0.685068							-5.808	29.9	-5.588	59.375	-5.96	25.166	-5.594	61.889		cultivars-2023	-5.78089	0.0335426	1.4	0.163299
Cultivars-2023	26.4224	1.33359	186.807	29.9904	19.2674	2.7577							-5.807	30	-5.588	59.688	-5.958	25.298	-5.586	62.215		cultivars-2023	-5.52323	0.0605737	2.3	0.3
Cultivars-2023	32.9119	1.3784	160.221	14.8265	13.3371	0.875659							-5.806	30.2	-5.582	60	-5.957	25.43	-5.585	62.541		cultivars-2023	-5.57379	0.027925	1.4	0.163299
Cultivars-2023	38.3897	1.61557	134.508	13.7018	9.70528	0.896152							-5.806	30.3	-5.576	60.313	-5.956	25.563	-5.582	62.866		cultivars-2023	-5.86367	0.0319438	1.3	0.152753
Cultivars-2023	34.1137	1.3234	101.751	23.0063	8.491	2.0037							-5.806	30.5	-5.572	60.625	-5.956	25.695	-5.581	63.192		cultivars-2023	-5.93918	0.0982025	1.4	0.221108
Cultivars-2023	33.1819	1.50049	314.52	57.6562	25.5453	4.15258							-5.805	30.7	-5.571	60.938	-5.954	25.828	-5.581	63.518		cultivars-2023	-5.43899	0.0786538	1.5	0.166667
Cultivars-2023	30.4823	0.639554	65.6705	5.67781	6.03319	0.585195							-5.795	30.8	-5.569	61.25	-5.951	25.96	-5.569	63.844		cultivars-2023	-6.02812	0.0384767	0.9	0.1
Cultivars-2023	22.9152	0.951938	131.565	19.7261	15.4725	1.87301							-5.795	31	-5.568	61.563	-5.948	26.093	-5.567	64.169		cultivars-2023	-5.66941	0.0478605	1.7	0.213437
Cultivars-2023	34.0381	1.63766	67.076	7.47939	5.46945	0.568426							-5.794	31.1	-5.567	61.875	-5.948	26.225	-5.566	64.495		cultivars-2023	-6.04316	0.0576	0.7	0.152753
Cultivars-2023	37.8128	0.913752	113.912	5.32742	8.41399	0.4508							-5.793	31.3	-5.565	62.188	-5.947	26.358	-5.566	64.821		cultivars-2023	-5.86594	0.0242307	0.8	0.133333
Cultivars-2023	34.6117	1.40681	163.695	16.9902	13.1435	1.3481							-5.791	31.4	-5.564	62.5	-5.945	26.49	-5.565	65.147		cultivars-2023	-5.71615	0.046518	1.3	0.152753
Cultivars-2023	30.2719	0.678524	195.137	19.2224	18.0368	1.87397							-5.791	31.6	-5.563	62.813	-5.945	26.623	-5.565	65.472		cultivars-2023	-5.59	0.0510371	1.8	0.249444
Cultivars-2023	31.0515	1.11525	224.39	50.1797	20.1382	4.5658							-5.789	31.8	-5.552	63.125	-5.943	26.755	-5.563	65.798		cultivars-2023	-5.63304	0.101882	1.3	0.213437
													-5.787	31.9	-5.549	63.438	-5.941	26.887	-5.561	66.124
													-5.787	32.1	-5.549	63.75	-5.939	27.02	-5.561	66.45
													-5.784	32.2	-5.548	64.063	-5.937	27.152	-5.558	66.775
													-5.784	32.4	-5.548	64.375	-5.937	27.285	-5.556	67.101
													-5.784	32.5	-5.546	64.688	-5.934	27.417	-5.553	67.427
													-5.782	32.7	-5.541	65	-5.934	27.55	-5.553	67.752
													-5.78	32.9	-5.54	65.313	-5.934	27.682	-5.552	68.078
													-5.779	33	-5.537	65.625	-5.934	27.815	-5.547	68.404
													-5.778	33.2	-5.53	65.938	-5.932	27.947	-5.543	68.73
													-5.777	33.3	-5.53	66.25	-5.932	28.079	-5.54	69.055
													-5.776	33.5	-5.528	66.563	-5.93	28.212	-5.534	69.381
													-5.775	33.6	-5.526	66.875	-5.93	28.344	-5.533	69.707
													-5.775	33.8	-5.524	67.188	-5.929	28.477	-5.531	70.033
													-5.774	34	-5.524	67.5	-5.929	28.609	-5.53	70.358
													-5.771	34.1	-5.523	67.813	-5.928	28.742	-5.528	70.684
													-5.768	34.3	-5.521	68.125	-5.925	28.874	-5.528	71.01
													-5.767	34.4	-5.515	68.438	-5.925	29.007	-5.525	71.336
													-5.763	34.6	-5.513	68.75	-5.925	29.139	-5.523	71.661
													-5.762	34.7	-5.506	69.063	-5.924	29.272	-5.522	71.987
													-5.761	34.9	-5.503	69.375	-5.924	29.404	-5.519	72.313
													-5.76	35.1	-5.502	69.688	-5.921	29.536	-5.517	72.638
													-5.76	35.2	-5.501	70	-5.92	29.669	-5.511	72.964
													-5.758	35.4	-5.498	70.313	-5.92	29.801	-5.51	73.29
													-5.758	35.5	-5.49	70.625	-5.919	29.934	-5.51	73.616
													-5.754	35.7	-5.488	70.938	-5.918	30.066	-5.504	73.941
													-5.753	35.8	-5.487	71.25	-5.918	30.199	-5.494	74.267
													-5.753	36	-5.484	71.563	-5.916	30.331	-5.493	74.593
													-5.748	36.2	-5.483	71.875	-5.915	30.464	-5.483	74.919
													-5.747	36.3	-5.478	72.188	-5.913	30.596	-5.479	75.244
													-5.745	36.5	-5.476	72.5	-5.913	30.728	-5.479	75.57
													-5.744	36.6	-5.476	72.813	-5.912	30.861	-5.477	75.896
													-5.74	36.8	-5.475	73.125	-5.911	30.993	-5.477	76.221
													-5.74	36.9	-5.473	73.438	-5.91	31.126	-5.476	76.547
													-5.738	37.1	-5.471	73.75	-5.91	31.258	-5.474	76.873
													-5.737	37.3	-5.471	74.063	-5.909	31.391	-5.466	77.199
													-5.734	37.4	-5.47	74.375	-5.909	31.523	-5.465	77.524
													-5.734	37.6	-5.47	74.688	-5.907	31.656	-5.465	77.85
													-5.732	37.7	-5.469	75	-5.905	31.788	-5.463	78.176
													-5.731	37.9	-5.465	75.313	-5.905	31.921	-5.454	78.502
													-5.731	38.1	-5.46	75.625	-5.902	32.053	-5.453	78.827
													-5.73	38.2	-5.456	75.938	-5.9	32.185	-5.446	79.153
													-5.729	38.4	-5.454	76.25	-5.899	32.318	-5.441	79.479
													-5.729	38.5	-5.447	76.563	-5.896	32.45	-5.439	79.805
													-5.728	38.7	-5.441	76.875	-5.896	32.583	-5.437	80.13
													-5.727	38.8	-5.439	77.188	-5.894	32.715	-5.437	80.456
													-5.726	39	-5.438	77.5	-5.893	32.848	-5.432	80.782
													-5.724	39.2	-5.431	77.813	-5.892	32.98	-5.432	81.107
													-5.722	39.3	-5.428	78.125	-5.892	33.113	-5.425	81.433
													-5.721	39.5	-5.428	78.438	-5.892	33.245	-5.42	81.759
													-5.72	39.6	-5.425	78.75	-5.891	33.377	-5.418	82.085
													-5.72	39.8	-5.415	79.063	-5.89	33.51	-5.414	82.41
													-5.72	39.9	-5.413	79.375	-5.89	33.642	-5.409	82.736
													-5.719	40.1	-5.409	79.688	-5.889	33.775	-5.407	83.062
													-5.717	40.3	-5.402	80	-5.889	33.907	-5.403	83.388
													-5.716	40.4	-5.4	80.313	-5.889	34.04	-5.399	83.713
													-5.713	40.6	-5.399	80.625	-5.888	34.172	-5.399	84.039
													-5.713	40.7	-5.395	80.938	-5.887	34.305	-5.398	84.365
													-5.711	40.9	-5.39	81.25	-5.887	34.437	-5.393	84.691
													-5.711	41	-5.39	81.563	-5.887	34.57	-5.39	85.016
													-5.703	41.2	-5.388	81.875	-5.886	34.702	-5.39	85.342
													-5.702	41.4	-5.386	82.188	-5.886	34.834	-5.389	85.668
													-5.702	41.5	-5.384	82.5	-5.886	34.967	-5.388	85.993
													-5.699	41.7	-5.384	82.813	-5.884	35.099	-5.384	86.319
													-5.697	41.8	-5.383	83.125	-5.884	35.232	-5.382	86.645
													-5.694	42	-5.381	83.438	-5.883	35.364	-5.375	86.971
													-5.694	42.1	-5.38	83.75	-5.883	35.497	-5.374	87.296
													-5.693	42.3	-5.38	84.063	-5.882	35.629	-5.365	87.622
													-5.691	42.5	-5.379	84.375	-5.88	35.762	-5.365	87.948
													-5.691	42.6	-5.378	84.688	-5.879	35.894	-5.363	88.274
													-5.689	42.8	-5.373	85	-5.879	36.026	-5.358	88.599
													-5.689	42.9	-5.372	85.313	-5.879	36.159	-5.348	88.925
													-5.688	43.1	-5.372	85.625	-5.877	36.291	-5.347	89.251
													-5.687	43.2	-5.37	85.938	-5.877	36.424	-5.34	89.577
													-5.687	43.4	-5.366	86.25	-5.876	36.556	-5.326	89.902
													-5.686	43.6	-5.362	86.563	-5.875	36.689	-5.326	90.228
													-5.685	43.7	-5.355	86.875	-5.874	36.821	-5.325	90.554
													-5.682	43.9	-5.354	87.188	-5.874	36.954	-5.323	90.879
													-5.682	44	-5.354	87.5	-5.873	37.086	-5.32	91.205
													-5.681	44.2	-5.354	87.813	-5.873	37.219	-5.31	91.531
													-5.68	44.3	-5.353	88.125	-5.872	37.351	-5.309	91.857
													-5.677	44.5	-5.353	88.438	-5.872	37.483	-5.306	92.182
													-5.677	44.7	-5.347	88.75	-5.872	37.616	-5.303	92.508
													-5.674	44.8	-5.346	89.063	-5.871	37.748	-5.299	92.834
													-5.673	45	-5.34	89.375	-5.871	37.881	-5.295	93.16
													-5.673	45.1	-5.335	89.688	-5.871	38.013	-5.288	93.485
													-5.671	45.3	-5.335	90	-5.871	38.146	-5.281	93.811
													-5.67	45.4	-5.322	90.313	-5.869	38.278	-5.278	94.137
													-5.668	45.6	-5.318	90.625	-5.869	38.411	-5.274	94.463
													-5.667	45.8	-5.316	90.938	-5.869	38.543	-5.267	94.788
													-5.667	45.9	-5.305	91.25	-5.868	38.675	-5.266	95.114
													-5.666	46.1	-5.304	91.563	-5.868	38.808	-5.258	95.44
													-5.665	46.2	-5.296	91.875	-5.867	38.94	-5.251	95.765
													-5.665	46.4	-5.29	92.188	-5.864	39.073	-5.251	96.091		F1
													-5.665	46.5	-5.283	92.5	-5.859	39.205	-5.251	96.417		F1
													-5.664	46.7	-5.266	92.813	-5.858	39.338	-5.248	96.743		F1
													-5.663	46.9	-5.262	93.125	-5.858	39.47	-5.248	97.068		F1
													-5.663	47	-5.26	93.438	-5.857	39.603	-5.24	97.394		F1
													-5.662	47.2	-5.241	93.75	-5.857	39.735	-5.236	97.72		F1
													-5.661	47.3	-5.236	94.063	-5.857	39.868	-5.232	98.046		F1
													-5.661	47.5	-5.227	94.375	-5.857	40	-5.216	98.371		F1
													-5.66	47.6	-5.219	94.688	-5.855	40.132	-5.213	98.697		F1
													-5.66	47.8	-5.218	95	-5.855	40.265	-5.206	99.023		F1
													-5.66	48	-5.209	95.313	-5.855	40.397	-5.205	99.349		F1
													-5.656	48.1	-5.204	95.625	-5.853	40.53	-5.174	99.674		F1
													-5.656	48.3	-5.193	95.938	-5.853	40.662	-5.155	100		F1
													-5.655	48.4	-5.182	96.25	-5.851	40.795				F1
													-5.654	48.6	-5.173	96.563	-5.85	40.927				F1
													-5.653	48.7	-5.169	96.875	-5.849	41.06				F1
													-5.652	48.9	-5.165	97.188	-5.849	41.192				F1
													-5.652	49.1	-5.162	97.5	-5.848	41.325				F1
													-5.652	49.2	-5.128	97.813	-5.847	41.457				F1
													-5.65	49.4	-5.124	98.125	-5.845	41.589				F1
													-5.646	49.5	-5.123	98.438	-5.844	41.722				F1
													-5.646	49.7	-5.094	98.75	-5.844	41.854				F1
													-5.646	49.8	-5.091	99.063	-5.843	41.987				F1
													-5.644	50	-5.089	99.375	-5.843	42.119				F1
													-5.641	50.2	-5.071	99.688	-5.843	42.252				F1
													-5.641	50.3	-4.881	100	-5.842	42.384				F1
													-5.64	50.5			-5.84	42.517				F1
													-5.64	50.6			-5.84	42.649				F1
													-5.637	50.8			-5.839	42.781				F1
													-5.637	50.9			-5.839	42.914				F1
													-5.634	51.1			-5.838	43.046				F1
													-5.634	51.3			-5.838	43.179				F1
													-5.633	51.4			-5.837	43.311				F1
													-5.63	51.6			-5.837	43.444				F1
													-5.629	51.7			-5.836	43.576				F1
													-5.629	51.9			-5.835	43.709				F1
													-5.624	52			-5.835	43.841				F1
													-5.624	52.2			-5.835	43.974				F1
													-5.623	52.4			-5.834	44.106				F1
													-5.62	52.5			-5.833	44.238				F1
													-5.618	52.7			-5.833	44.371				F1
													-5.618	52.8			-5.831	44.503				F1
													-5.614	53			-5.831	44.636				F1
													-5.61	53.1			-5.829	44.768				F1
													-5.609	53.3			-5.829	44.901				F1
													-5.605	53.5			-5.829	45.033				F1
													-5.602	53.6			-5.829	45.166				F1
													-5.601	53.8			-5.828	45.298				F1
													-5.601	53.9			-5.828	45.43				F1
													-5.6	54.1			-5.828	45.563				F1
													-5.599	54.2			-5.827	45.695				F1
													-5.599	54.4			-5.826	45.828				F1
													-5.597	54.6			-5.825	45.96				F1
													-5.596	54.7			-5.824	46.093				F1
													-5.595	54.9			-5.822	46.225				F1
													-5.594	55			-5.822	46.358				F1
													-5.592	55.2			-5.82	46.49				F1
													-5.59	55.3			-5.819	46.623				F1
													-5.59	55.5			-5.819	46.755				F1
													-5.588	55.7			-5.819	46.887				F1
													-5.588	55.8			-5.818	47.02				F1
													-5.588	56			-5.817	47.152				F1
													-5.587	56.1			-5.817	47.285				F1
													-5.586	56.3			-5.817	47.417				F1
													-5.586	56.4			-5.814	47.55				F1
													-5.585	56.6			-5.813	47.682				F1
													-5.584	56.8			-5.812	47.815				F1
													-5.584	56.9			-5.812	47.947				F1
													-5.581	57.1			-5.811	48.079				F1
													-5.58	57.2			-5.811	48.212				F1
													-5.579	57.4			-5.81	48.344				F1
													-5.575	57.5			-5.809	48.477				F1
													-5.574	57.7			-5.808	48.609				F1
													-5.572	57.9			-5.807	48.742				F1
													-5.572	58			-5.806	48.874				F1
													-5.567	58.2			-5.806	49.007				F1
													-5.566	58.3			-5.803	49.139				F1
													-5.566	58.5			-5.798	49.272				F1
													-5.566	58.6			-5.796	49.404				F1
													-5.565	58.8			-5.795	49.536				F1
													-5.565	59			-5.793	49.669				F1
													-5.565	59.1			-5.793	49.801				F1
													-5.565	59.3			-5.792	49.934				F1
													-5.565	59.4			-5.792	50.066				F1
													-5.564	59.6			-5.791	50.199				F1
													-5.564	59.7			-5.79	50.331				F1
													-5.564	59.9			-5.789	50.464				F1
													-5.559	60.1			-5.789	50.596				F1
													-5.559	60.2			-5.788	50.728				F1
													-5.558	60.4			-5.787	50.861				F1
													-5.558	60.5			-5.787	50.993				F1
													-5.558	60.7			-5.786	51.126				F1
													-5.557	60.8			-5.786	51.258				F1
													-5.555	61			-5.785	51.391				F1
													-5.554	61.2			-5.784	51.523				F1
													-5.554	61.3			-5.783	51.656				F1
													-5.551	61.5			-5.781	51.788				F1
													-5.551	61.6			-5.78	51.921				F1
													-5.549	61.8			-5.779	52.053				F1
													-5.549	61.9			-5.778	52.185				F1
													-5.548	62.1			-5.778	52.318				F1
													-5.548	62.3			-5.777	52.45				F1
													-5.547	62.4			-5.776	52.583				F1
													-5.545	62.6			-5.776	52.715				F1
													-5.545	62.7			-5.775	52.848				F1
													-5.543	62.9			-5.775	52.98				F1
													-5.543	63.1			-5.774	53.113				F1
													-5.543	63.2			-5.774	53.245				F1
													-5.541	63.4			-5.773	53.377				F1
													-5.539	63.5			-5.773	53.51				F1
													-5.539	63.7			-5.771	53.642				F1
													-5.538	63.8			-5.769	53.775				F1
													-5.538	64			-5.768	53.907				F1
													-5.536	64.2			-5.767	54.04				F1
													-5.535	64.3			-5.766	54.172				F1
													-5.535	64.5			-5.765	54.305				F1
													-5.534	64.6			-5.765	54.437				F1
													-5.534	64.8			-5.764	54.57				F1
													-5.534	64.9			-5.764	54.702				F1
													-5.531	65.1			-5.763	54.834				F1
													-5.529	65.3			-5.762	54.967				F1
													-5.529	65.4			-5.761	55.099				F1
													-5.527	65.6			-5.761	55.232				F1
													-5.523	65.7			-5.759	55.364				F1
													-5.52	65.9			-5.759	55.497				F1
													-5.52	66			-5.759	55.629				F1
													-5.519	66.2			-5.759	55.762				F1
													-5.519	66.4			-5.757	55.894				F1
													-5.519	66.5			-5.755	56.026				F1
													-5.513	66.7			-5.754	56.159				F1
													-5.512	66.8			-5.751	56.291				F1
													-5.511	67			-5.75	56.424				F1
													-5.51	67.1			-5.748	56.556				F1
													-5.509	67.3			-5.747	56.689				F1
													-5.509	67.5			-5.745	56.821				F1
													-5.509	67.6			-5.744	56.954				F1
													-5.509	67.8			-5.741	57.086				F1
													-5.505	67.9			-5.741	57.219				F1
													-5.502	68.1			-5.74	57.351				F1
													-5.501	68.2			-5.74	57.483				F1
													-5.5	68.4			-5.74	57.616				F1
													-5.5	68.6			-5.74	57.748				F1
													-5.499	68.7			-5.738	57.881				F1
													-5.499	68.9			-5.738	58.013				F1
													-5.497	69			-5.738	58.146				F1
													-5.496	69.2			-5.737	58.278				F1
													-5.496	69.3			-5.737	58.411				F1
													-5.494	69.5			-5.731	58.543				F1
													-5.493	69.7			-5.731	58.675				F1
													-5.493	69.8			-5.731	58.808				F1
													-5.492	70			-5.731	58.94				F1
													-5.49	70.1			-5.731	59.073				F1
													-5.489	70.3			-5.728	59.205				F1
													-5.486	70.4			-5.728	59.338				F1
													-5.486	70.6			-5.726	59.47				F1
													-5.485	70.8			-5.725	59.603				F1
													-5.485	70.9			-5.724	59.735				F1
													-5.479	71.1			-5.723	59.868				F1
													-5.475	71.2			-5.722	60				F1
													-5.474	71.4			-5.722	60.132				F1
													-5.473	71.5			-5.72	60.265				F1
													-5.473	71.7			-5.717	60.397				F1
													-5.471	71.9			-5.716	60.53				F1
													-5.47	72			-5.716	60.662				F1
													-5.469	72.2			-5.714	60.795				F1
													-5.469	72.3			-5.714	60.927				F1
													-5.468	72.5			-5.714	61.06				F1
													-5.465	72.6			-5.714	61.192				F1
													-5.463	72.8			-5.712	61.325				F1
													-5.462	73			-5.712	61.457				F1
													-5.461	73.1			-5.711	61.589				F1
													-5.46	73.3			-5.709	61.722				F1
													-5.459	73.4			-5.706	61.854				F1
													-5.459	73.6			-5.705	61.987				F1
													-5.459	73.7			-5.704	62.119				F1
													-5.459	73.9			-5.704	62.252				F1
													-5.459	74.1			-5.704	62.384				F1
													-5.457	74.2			-5.703	62.517				F1
													-5.456	74.4			-5.703	62.649				F1
													-5.455	74.5			-5.702	62.781				F1
													-5.454	74.7			-5.701	62.914				F1
													-5.452	74.8			-5.701	63.046				F1
													-5.451	75			-5.697	63.179				F1
													-5.449	75.2			-5.697	63.311				F1
													-5.449	75.3			-5.696	63.444				F1
													-5.449	75.5			-5.696	63.576				F1
													-5.448	75.6			-5.696	63.709				F1
													-5.447	75.8			-5.694	63.841				F1
													-5.446	75.9			-5.694	63.974				F1
													-5.445	76.1			-5.694	64.106				F1
													-5.442	76.3			-5.694	64.238				F1
													-5.442	76.4			-5.694	64.371				F1
													-5.439	76.6			-5.694	64.503				F1
													-5.438	76.7			-5.693	64.636				F1
													-5.438	76.9			-5.691	64.768				F1
													-5.435	77			-5.69	64.901				F1
													-5.435	77.2			-5.687	65.033				F1
													-5.432	77.4			-5.686	65.166				F1
													-5.43	77.5			-5.686	65.298				F1
													-5.43	77.7			-5.685	65.43				F1
													-5.426	77.8			-5.684	65.563				F1
													-5.425	78			-5.684	65.695				F1
													-5.423	78.1			-5.683	65.828				F1
													-5.423	78.3			-5.683	65.96				F1
													-5.422	78.5			-5.683	66.093				F1
													-5.42	78.6			-5.682	66.225				F1
													-5.42	78.8			-5.681	66.358				F1
													-5.419	78.9			-5.681	66.49				F1
													-5.418	79.1			-5.68	66.623				F1
													-5.418	79.2			-5.679	66.755				F1
													-5.418	79.4			-5.679	66.887				F1
													-5.418	79.6			-5.678	67.02				F1
													-5.412	79.7			-5.676	67.152				F1
													-5.412	79.9			-5.675	67.285				F1
													-5.411	80			-5.674	67.417				F1
													-5.41	80.2			-5.673	67.55				F1
													-5.408	80.3			-5.673	67.682				F1
													-5.401	80.5			-5.673	67.815				F1
													-5.401	80.7			-5.671	67.947				F1
													-5.401	80.8			-5.67	68.079				F1
													-5.398	81			-5.67	68.212				F1
													-5.398	81.1			-5.669	68.344				F1
													-5.396	81.3			-5.668	68.477				F1
													-5.395	81.4			-5.668	68.609				F1
													-5.393	81.6			-5.668	68.742				F1
													-5.393	81.8			-5.668	68.874				F1
													-5.393	81.9			-5.667	69.007				F1
													-5.392	82.1			-5.666	69.139				F1
													-5.392	82.2			-5.663	69.272				F1
													-5.391	82.4			-5.663	69.404				F1
													-5.388	82.5			-5.662	69.536				F1
													-5.387	82.7			-5.661	69.669				F1
													-5.387	82.9			-5.66	69.801				F1
													-5.384	83			-5.66	69.934				F1
													-5.383	83.2			-5.66	70.066				F1
													-5.382	83.3			-5.659	70.199				F1
													-5.38	83.5			-5.659	70.331				F1
													-5.379	83.6			-5.659	70.464				F1
													-5.375	83.8			-5.658	70.596				F1
													-5.372	84			-5.658	70.728				F1
													-5.37	84.1			-5.657	70.861				F1
													-5.368	84.3			-5.656	70.993				F1
													-5.361	84.4			-5.656	71.126				F1
													-5.36	84.6			-5.656	71.258				F1
													-5.358	84.7			-5.653	71.391				F1
													-5.357	84.9			-5.653	71.523				F1
													-5.357	85.1			-5.652	71.656				F1
													-5.355	85.2			-5.651	71.788				F1
													-5.354	85.4			-5.651	71.921				F1
													-5.354	85.5			-5.65	72.053				F1
													-5.352	85.7			-5.649	72.185				F1
													-5.346	85.8			-5.649	72.318				F1
													-5.343	86			-5.648	72.45				F1
													-5.343	86.2			-5.648	72.583				F1
													-5.341	86.3			-5.647	72.715				F1
													-5.34	86.5			-5.643	72.848				F1
													-5.34	86.6			-5.642	72.98				F1
													-5.339	86.8			-5.642	73.113				F1
													-5.338	86.9			-5.642	73.245				F1
													-5.333	87.1			-5.641	73.377				F1
													-5.333	87.3			-5.64	73.51				F1
													-5.332	87.4			-5.64	73.642				F1
													-5.331	87.6			-5.639	73.775				F1
													-5.325	87.7			-5.639	73.907				F1
													-5.322	87.9			-5.637	74.04				F1
													-5.32	88.1			-5.636	74.172				F1
													-5.318	88.2			-5.636	74.305				F1
													-5.315	88.4			-5.635	74.437				F1
													-5.311	88.5			-5.633	74.57				F1
													-5.307	88.7			-5.631	74.702				F1
													-5.305	88.8			-5.63	74.834				F1
													-5.304	89			-5.63	74.967				F1
													-5.301	89.2			-5.628	75.099				F1
													-5.297	89.3			-5.627	75.232				F1
													-5.293	89.5			-5.626	75.364				F1
													-5.282	89.6			-5.625	75.497				F1
													-5.281	89.8			-5.624	75.629				F1
													-5.281	89.9			-5.622	75.762				F1
													-5.28	90.1			-5.622	75.894				F1
													-5.279	90.3			-5.622	76.026				F1
													-5.278	90.4			-5.622	76.159				F1
													-5.276	90.6			-5.62	76.291				F1
													-5.269	90.7			-5.62	76.424				F1
													-5.267	90.9			-5.619	76.556				F1
													-5.266	91			-5.617	76.689				F1
													-5.266	91.2			-5.617	76.821				F1
													-5.266	91.4			-5.616	76.954				F1
													-5.264	91.5			-5.615	77.086				F1
													-5.263	91.7			-5.613	77.219				F1
													-5.257	91.8			-5.613	77.351				F1
													-5.256	92			-5.612	77.483				F1
													-5.254	92.1			-5.612	77.616				F1
													-5.251	92.3			-5.609	77.748				F1
													-5.247	92.5			-5.607	77.881				F1
													-5.247	92.6			-5.607	78.013				F1
													-5.246	92.8			-5.606	78.146				F1
													-5.245	92.9			-5.605	78.278				F1
													-5.244	93.1			-5.604	78.411				F1
													-5.243	93.2			-5.604	78.543				F1
													-5.243	93.4			-5.603	78.675				F1
													-5.242	93.6			-5.601	78.808				F1
													-5.239	93.7			-5.599	78.94				F1
													-5.239	93.9			-5.599	79.073				F1
													-5.239	94			-5.599	79.205				F1
													-5.235	94.2			-5.599	79.338				F1
													-5.23	94.3			-5.599	79.47				F1
													-5.225	94.5			-5.596	79.603				F1
													-5.217	94.7			-5.595	79.735				F1
													-5.211	94.8			-5.594	79.868				F1
													-5.209	95			-5.592	80				F1
													-5.207	95.1			-5.592	80.132				F1
													-5.206	95.3			-5.591	80.265				F1
													-5.204	95.4			-5.59	80.397				F1
													-5.202	95.6			-5.59	80.53				F1
													-5.195	95.8			-5.589	80.662				F1
													-5.194	95.9			-5.588	80.795				F1
													-5.188	96.1			-5.588	80.927				F1
													-5.186	96.2			-5.587	81.06				F1
													-5.186	96.4			-5.586	81.192				F1
													-5.181	96.5			-5.586	81.325				F1
													-5.179	96.7			-5.585	81.457				F1
													-5.175	96.9			-5.583	81.589				F1
													-5.174	97			-5.583	81.722				F1
													-5.172	97.2			-5.583	81.854				F1
													-5.163	97.3			-5.58	81.987				F1
													-5.163	97.5			-5.58	82.119				F1
													-5.159	97.6			-5.579	82.252				F1
													-5.153	97.8			-5.579	82.384				F1
													-5.149	98			-5.578	82.517				F1
													-5.133	98.1			-5.577	82.649				F1
													-5.13	98.3			-5.575	82.781				F1
													-5.127	98.4			-5.572	82.914				F1
													-5.126	98.6			-5.571	83.046				F1
													-5.124	98.7			-5.571	83.179				F1
													-5.123	98.9			-5.568	83.311				F1
													-5.122	99.1			-5.565	83.444				F1
													-5.109	99.2			-5.563	83.576				F1
													-5.105	99.4			-5.561	83.709				F1
													-5.087	99.5			-5.56	83.841				F1
													-5.065	99.7			-5.558	83.974				F1
													-5.05	99.8			-5.557	84.106				F1
													-5.039	100			-5.554	84.238				F1
																	-5.553	84.371				F1
																	-5.553	84.503				F1
																	-5.553	84.636				F1
																	-5.552	84.768				F1
																	-5.551	84.901				F1
																	-5.55	85.033				F1
																	-5.549	85.166				F1
																	-5.548	85.298				F1
																	-5.546	85.43				F1
																	-5.544	85.563				F1
																	-5.544	85.695				F1
																	-5.543	85.828				F1
																	-5.54	85.96				F1
																	-5.539	86.093				F1
																	-5.537	86.225				F1
																	-5.537	86.358				F1
																	-5.536	86.49				F1
																	-5.535	86.623				F1
																	-5.535	86.755				F1
																	-5.534	86.887				F1
																	-5.534	87.02				F1
																	-5.532	87.152				F1
																	-5.531	87.285				F1
																	-5.528	87.417				F1
																	-5.528	87.55				F1
																	-5.524	87.682				F1
																	-5.522	87.815				F1
																	-5.522	87.947				F1
																	-5.515	88.079				F1
																	-5.514	88.212				F1
																	-5.514	88.344				F1
																	-5.513	88.477				F1
																	-5.513	88.609				F1
																	-5.513	88.742				F1
																	-5.512	88.874				F1
																	-5.512	89.007				F1
																	-5.51	89.139				F1
																	-5.508	89.272				F1
																	-5.508	89.404				F1
																	-5.507	89.536				F1
																	-5.504	89.669				F1
																	-5.503	89.801				F1
																	-5.499	89.934				F1
																	-5.499	90.066				F1
																	-5.498	90.199				F1
																	-5.497	90.331				F1
																	-5.494	90.464				F1
																	-5.493	90.596				F1
																	-5.491	90.728				F1
																	-5.49	90.861				F1
																	-5.487	90.993				F1
																	-5.487	91.126				F1
																	-5.486	91.258				F1
																	-5.486	91.391				F1
																	-5.484	91.523				F1
																	-5.484	91.656				F1
																	-5.482	91.788				F1
																	-5.481	91.921				F1
																	-5.476	92.053				F1
																	-5.476	92.185				F1
																	-5.476	92.318				F1
																	-5.476	92.45				F1
																	-5.475	92.583				F1
																	-5.473	92.715				F1
																	-5.472	92.848				F1
																	-5.465	92.98				F1
																	-5.464	93.113				F1
																	-5.463	93.245				F1
																	-5.462	93.377				F1
																	-5.461	93.51				F1
																	-5.459	93.642				F1
																	-5.457	93.775				F1
																	-5.454	93.907				F1
																	-5.45	94.04				F1
																	-5.449	94.172				F1
																	-5.447	94.305				F1
																	-5.442	94.437				F1
																	-5.442	94.57				F1
																	-5.439	94.702				F1
																	-5.438	94.834				F1
																	-5.438	94.967				F1
																	-5.428	95.099				F1
																	-5.418	95.232				F1
																	-5.417	95.364				F1
																	-5.406	95.497				F1
																	-5.399	95.629				F1
																	-5.398	95.762				F1
																	-5.396	95.894				F1
																	-5.394	96.026				F1
																	-5.391	96.159				F1
																	-5.386	96.291				F1
																	-5.386	96.424				F1
																	-5.378	96.556				F1
																	-5.352	96.689				F1
																	-5.337	96.821				F1
																	-5.332	96.954				F1
																	-5.331	97.086				F1
																	-5.322	97.219				F1
																	-5.317	97.351				F1
																	-5.317	97.483				F1
																	-5.311	97.616				F1
																	-5.311	97.748				F1
																	-5.304	97.881				F1
																	-5.302	98.013				F1
																	-5.293	98.146				F1
																	-5.28	98.278				F1
																	-5.268	98.411				F1
																	-5.264	98.543				F1
																	-5.245	98.675				F1
																	-5.245	98.808				F1
																	-5.242	98.94				F1
																	-5.241	99.073				F1
																	-5.234	99.205				F1
																	-5.212	99.338				F1
																	-5.195	99.47				F1
																	-5.193	99.603				F1
																	-5.142	99.735				F1
																	-5.113	99.868				F1
																	-5.092	100				F1
																						F1
																						F1
																						F1
																						F1
																						F1
																						F1
																						F1
																						F1
																						F1
																						F1
																						F1
																						F1
																						F1
																						F1
																						F1
																						F1
																						F1
																						F1
																						F1
																						F1
																						F1
																						F1
																						F1
																						F1
																						F1
																						F1
																						F1
																						wild
																						wild
																						wild
																						wild
																						wild
																						wild
																						wild
																						wild
																						wild
																						wild
																						wild
																						wild
																						wild
																						wild
																						wild
																						wild
																						wild
																						wild
																						wild
																						wild
																						wild
																						wild
																						wild
																						wild
																						wild
																						wild
																						wild
																						wild
																						wild
																						wild
																						wild
																						wild
																						wild
																						wild
																						wild
																						wild
																						wild
																						wild
																						wild
																						wild
																						wild
																						wild
																						wild
																						wild
																						wild
																						wild
																						wild
																						wild
																						wild
																						wild
																						wild
																						wild
																						wild
																						wild
																						wild
																						wild
																						wild
																						wild
																						wild
																						wild
																						wild
																						wild
																						wild
																						wild
																						wild
																						wild
																						wild
																						wild
																						wild
																						wild
																						wild
																						wild
																						wild
																						wild
																						wild
																						wild
																						wild
																						wild
																						wild
																						wild
																						wild
																						wild
																						wild
																						wild
																						wild
																						wild
																						wild
																						wild
																						wild
																						wild
																						wild
																						wild
																						wild
																						wild
																						wild
																						wild
																						wild
																						wild
																						wild
																						wild
																						wild
																						wild
																						wild
																						wild
																						wild
																						wild
																						wild
																						wild
																						wild
																						wild
																						wild
																						wild
																						wild
																						wild
																						wild
																						wild
																						wild
																						wild
																						wild
																						wild
																						wild
																						wild
																						wild
																						wild
																						wild
																						wild
																						wild
																						wild
																						wild
																						wild
																						wild
																						wild
																						wild
																						wild
																						wild
																						wild
																						wild
																						wild
																						wild
																						wild
																						wild
																						wild
																						wild
																						wild
																						wild
																						wild
																						wild
																						wild
																						wild
																						wild
																						wild
																						wild
																						wild
																						wild
																						wild
																						wild
																						wild
																						wild
																						wild
																						wild
																						wild
																						wild
																						wild
																						wild
																						wild
																						wild
																						wild
																						wild
																						wild
																						wild
																						wild
																						wild
																						wild
																						wild
																						wild
																						wild
																						wild
																						wild
																						wild
																						wild
																						wild
																						wild
																						wild
																						wild
																						wild
																						wild
																						wild
																						wild
																						wild
																						wild
																						wild
																						wild
																						wild
																						wild
																						wild
																						wild
																						wild
																						wild
																						wild
																						wild
																						wild
																						wild
																						wild
																						wild
																						wild
																						wild
																						wild
																						wild
																						wild
																						wild
																						wild
																						wild
																						wild
																						wild
																						wild
																						wild
																						wild
																						wild
																						wild
																						wild
																						wild
																						wild
																						wild
																						wild
																						wild
																						wild
																						wild
																						wild
																						wild
																						wild
																						wild
																						wild
																						wild
																						wild
																						wild
																						wild
																						wild
																						wild
																						wild
																						wild
																						wild
																						wild
																						wild
																						wild
																						wild
																						wild
																						wild
																						wild
																						wild
																						wild
																						wild
																						wild
																						wild
																						wild
																						wild
																						wild
																						wild
																						wild
																						wild
																						wild
																						wild
																						wild
																						wild
																						wild
																						wild
																						wild
																						wild
																						wild
																						wild
																						wild
																						wild
																						wild
																						wild
																						wild
																						wild
																						wild
																						wild
																						wild
																						wild
																						wild
																						wild
																						wild
																						wild
																						wild
																						wild
																						wild
																						wild
																						wild
																						wild
																						wild
																						wild
																						wild
																						wild
																						wild
																						wild
																						wild
																						wild
																						wild
																						wild
																						wild
																						wild
																						wild
																						wild
																						wild
																						wild
																						wild
																						wild
																						wild
																						wild
																						wild
																						wild
																						wild
																						wild
																						wild
																						wild
																						wild
																						wild
																						wild
																						wild
																						wild
																						wild
																						wild
																						wild
																						wild
																						wild

## Sheet: Table 1
Group	species	genotype	year	WS at 4h (rating)	Time lag (h)	U (rating/h)
cultivars	F.ananassa	141033	2022	2.1	1.35575	1.04802
cultivars	F.ananassa	141035	2022	1.3	1.42511	0.568525
cultivars	F.ananassa	180059	2022	2.4	0.776929	1.13811
cultivars	F.ananassa	180217	2022	3.2	0.70744	1.50976
cultivars	F.ananassa	180606	2022	2.4	1.07549	1.44517
cultivars	F.ananassa	190128	2022	2.5	1.0283	1.29529
cultivars	F.ananassa	190172	2022	1.55556	1.94428	0.958155
cultivars	F.ananassa	190243	2022	2.2	1.42424	1.1398
cultivars	F.ananassa	190255	2022	1.2	2.30498	1.01237
cultivars	F.ananassa	190324	2022	3	0.517678	1.29228
cultivars	F.ananassa	190349	2022	1.9	0.819991	1.08875
cultivars	F.ananassa	190361	2022	1.8	0.888352	1.1936
cultivars	F.ananassa	190402	2022	1.8	0.954227	0.954071
cultivars	F.ananassa	190417	2022	2.1	0.694978	1.02934
cultivars	F.ananassa	201091	2022	2.11111	1.7168	1.0421
cultivars	F.ananassa	201167	2022	2.4	0.719632	1.10292
cultivars	F.ananassa	201357	2022	2.1	0.811082	1.48541
cultivars	F.ananassa	201392	2022	1.7	1.57748	0.977658
cultivars	F.ananassa	201401	2022	2	1.00263	1.09535
cultivars	F.ananassa	201409	2022	0.5	3.39829	0.563808
cultivars	F.ananassa	201419	2022	2.1	0.841653	0.968421
cultivars	F.ananassa	201438	2022	2	0.53779	1.12417
cultivars	F.ananassa	210017	2022	3.2	0.751054	1.37914
cultivars	F.ananassa	210035	2022	2.1	1.03075	0.878418
cultivars	F.ananassa	210056	2022	2.8	0.549016	1.23604
cultivars	F.ananassa	210087	2022	1.9	0.910241	0.772736
cultivars	F.ananassa	210096	2022	2.7	0.79444	1.70406
cultivars	F.ananassa	210099	2022	1.9	1.02798	1.2639
cultivars	F.ananassa	210103	2022	2.4	0.71909	1.18862
cultivars	F.ananassa	210140	2022	2.3	0.745471	1.15053
cultivars	F.ananassa	210161	2022	2.7	0.684036	1.25744
cultivars	F.ananassa	210689	2022	2.4	0.516851	0.867473
cultivars	F.ananassa	210697	2022	4	0.462627	2
cultivars	F.ananassa	210706	2022	4	0.674217	1.95995
cultivars	F.ananassa	210726	2022	1.4	1.74628	1.15266
cultivars	F.ananassa	210727	2022	2	0.651441	1.20331
cultivars	F.ananassa	210738	2022	1.7	0.918229	0.772863
cultivars	F.ananassa	210745	2022	2	0.809678	1.421
cultivars	F.ananassa	210757	2022	1	2.42493	0.836667
cultivars	F.ananassa	210764	2022	2.2	0.798772	1.20777
cultivars	F.ananassa	210789	2022	2.3	0.736474	1.15055
cultivars	F.ananassa	210795	2022	2.9	0.679333	1.5306
cultivars	F.ananassa	34-20-7C	2022	2.7	0.548561	1.15544
cultivars	F.ananassa	90622	2022	1.33333	2.68064	0.92114
cultivars	F.ananassa	94025	2022	1.7	0.789087	0.841594
cultivars	F.ananassa	Asia	2022	2.7	0.704107	1.25658
cultivars	F.ananassa	Bravura	2022	3.1	0.737614	1.27436
cultivars	F.ananassa	cerafine	2022	2.8	0.673869	1.21956
cultivars	F.ananassa	Clery	2022	2.1	0.635379	1.11003
cultivars	F.ananassa	Dahli	2022	2	1.44966	1.12734
cultivars	F.ananassa	Elsanta	2022	2	1.27717	1.09729
cultivars	F.ananassa	Elvie2	2022	1.5	2.33174	1.18491
cultivars	F.ananassa	Faith	2022	2.2	1.27699	1.04817
cultivars	F.ananassa	Flair	2022	3.2	0.654566	1.40694
cultivars	F.ananassa	Florentina	2022	1.9	1.43839	1.35289
cultivars	F.ananassa	Lola	2022	0.888889	2.31547	0.364541
cultivars	F.ananassa	Malling	2022	1.4	1.88812	1.01204
cultivars	F.ananassa	Marieka	2022	0.9	2.52745	0.788611
cultivars	F.ananassa	Renaissance	2022	2.8	1.01295	1.25009
cultivars	F.ananassa	Rendezvous	2022	1.8	1.14466	0.771162
cultivars	F.ananassa	Silvia	2022	1.4	1.76199	1.658
cultivars	F.ananassa	Sonata	2022	2.1	0.887929	1.44259
cultivars	F.ananassa	Sonsation	2022	1.9	1.32773	1.48359
cultivars	F.ananassa	vicontesse	2022	2.6	0.668932	1.52254
F2	F.ana.chilo	CS-001	2022	2.3	1.04687	1.1738
F2	F.ana.chilo	CS-002	2022	1.3	2.55724	1.19865
F2	F.ana.chilo	CS-004	2022	2.2	1.30332	1.1714
F2	F.ana.chilo	CS-008	2022	0.444444	3.80244	0.711541
F2	F.ana.chilo	CS-009	2022	1.5	1.86457	1.3734
F2	F.ana.chilo	CS-011	2022	1.6	1.89258	1.03964
F2	F.ana.chilo	CS-012	2022	1.8	1.56379	1.09235
F2	F.ana.chilo	CS-013	2022	0.3	4.74591	0.763786
F2	F.ana.chilo	CS-015	2022	1.2	1.86331	0.873064
F2	F.ana.chilo	CS-017	2022	2.66667	0.92847	1.12649
F2	F.ana.chilo	CS-021	2022	1.9	1.26265	1.09877
F2	F.ana.chilo	CS-022	2022	1.8	1.87945	1.01903
F2	F.ana.chilo	CS-023	2022	1.8	1.04855	0.997395
F2	F.ana.chilo	CS-027	2022	1.4	1.77608	1.00163
F2	F.ana.chilo	CS-028	2022	1.6	1.71915	0.959054
F2	F.ana.chilo	CS-029	2022	1.4	1.98234	0.86999
F2	F.ana.chilo	CS-030	2022	1.7	1.8357	1.10238
F2	F.ana.chilo	CS-032	2022	1.9	1.82843	1.18553
F2	F.ana.chilo	CS-033	2022	3.2	0.982229	1.48752
F2	F.ana.chilo	CS-034	2022	1.2	1.4672	1.26926
F2	F.ana.chilo	CS-035	2022	1.8	0.620003	1.33289
F2	F.ana.chilo	CS-036	2022	2.3	0.340406	1.59336
F2	F.ana.chilo	CS-037	2022	1.77778	0.731636	1.38296
F2	F.ana.chilo	CS-038	2022	2	0.722382	0.879652
F2	F.ana.chilo	CS-039	2022	1.7	1.57414	1.11166
F2	F.ana.chilo	CS-040	2022	2.2	1.13621	1.25886
F2	F.ana.chilo	CS-041	2022	1.9	1.25778	1.04923
F2	F.ana.chilo	CS-042	2022	1.4	1.62699	0.996298
F2	F.ana.chilo	CS-043	2022	1.8	1.64871	1.37115
F2	F.ana.chilo	CS-045	2022	1.9	2.59052	1.65876
F2	F.ana.chilo	CS-046	2022	2	1.31197	0.940325
F2	F.ana.chilo	CS-047	2022	2.9	0.816461	1.29618
F2	F.ana.chilo	CS-048	2022	1.3	2.68594	1.05886
F2	F.ana.chilo	CS-049	2022	1.8	1.63833	1.45183
F2	F.ana.chilo	CS-052	2022	2.2	1.16696	1.0304
F2	F.ana.chilo	CS-053	2022	2.1	0.891935	1.24799
F2	F.ana.chilo	CS-055	2022	1.8	1.43327	0.908853
F2	F.ana.chilo	CS-057	2022	1.3	2.21966	1.02404
F2	F.ana.chilo	CS-059	2022	2.5	1.34229	1.26644
F2	F.ana.chilo	CS-061	2022	3.1	0.648051	1.42548
F2	F.ana.chilo	CS-062	2022	1.7	0.891973	0.826276
F2	F.ana.chilo	CS-063	2022	2.1	1.1677	1.09597
F2	F.ana.chilo	CS-064	2022	1.5	2.15994	1.19681
F2	F.ana.chilo	CS-065	2022	1.9	1.52996	1.12622
F2	F.ana.chilo	CS-066	2022	1.22222	2.97009	0.901137
F2	F.ana.chilo	CS-068	2022	2.3	1.49223	1.28038
F2	F.ana.chilo	CS-069	2022	1.5	1.53176	0.80286
F2	F.ana.chilo	CS-071	2022	1.9	1.7264	1.17753
F2	F.ana.chilo	CS-072	2022	1	2.72669	1.24389
F2	F.ana.chilo	CS-073	2022	1.7	1.75093	1.29333
F2	F.ana.chilo	CS-074	2022	2	1.72752	1.27425
F2	F.ana.chilo	CS-075	2022	1.6	2.05633	1.20831
F2	F.ana.chilo	CS-076	2022	2.1	1.17353	1.27264
F2	F.ana.chilo	CS-077	2022	1.7	2.18264	1.19455
F2	F.ana.chilo	CS-078	2022	0.9	2.9894	0.936585
F2	F.ana.chilo	CS-079	2022	2.4	0.76095	1.02176
F2	F.ana.chilo	CS-081	2022	2.4	1.5211	1.3667
F2	F.ana.chilo	CS-082	2022	2.1	0.923193	1.08633
F2	F.ana.chilo	CS-083	2022	1.5	2.07989	1.04546
F2	F.ana.chilo	CS-084	2022	1.6	1.55998	1.35067
F2	F.ana.chilo	CS-086	2022	1.3	2.7203	1.32484
F2	F.ana.chilo	CS-087	2022	1.2	2.45495	1.21827
F2	F.ana.chilo	CS-088	2022	1.4	2.32358	1.3369
F2	F.ana.chilo	CS-089	2022	1.7	1.57323	0.809708
F2	F.ana.chilo	CS-090	2022	1.1	2.4027	0.970767
F2	F.ana.chilo	CS-092	2022	2.4	0.771875	0.90973
F2	F.ana.chilo	CS-093	2022	2.6	0.729191	1.07547
F2	F.ana.chilo	CS-094	2022	1.2	2.32829	1.14252
F2	F.ana.chilo	CS-097	2022	1.8	0.975565	0.945401
F2	F.ana.chilo	CS-101	2022	1.5	0.861573	0.896515
F2	F.ana.chilo	CS-103	2022	1.1	2.97419	1.31788
F2	F.ana.chilo	CS-104	2022	1	2.10256	0.88591
F2	F.ana.chilo	P-90999	2022	1.2	2.6426	0.66485
F2	F.ana.chilo	SengaS-F1	2022	1	3.46677	1.19174
F2	F.ana.chilo	SengaS2-F2	2022	1.6	2.1435	1.36349
F2	F.ana.chilo	USA1	2022	3.66667	0.77839	1.66833
Species	F. mandshurica	Baegdusan	2022	2	1.75798	1.47667
Species	F. mandshurica	Changshai.M	2022	2.2	1.14356	1.50494
Species	F. vesca	BailalSt94.13	2022	3.5	0.631377	1.67532
Species	F. vesca	CFRA.371.001	2022	3.4	0.722025	1.62517
Species	F. vesca	CFRA989.001	2022	3	1.25596	1.74149
Species	F. vesca	F.Eibenstack	2022	2.8	0.998258	1.15439
Species	F. vesca	Korsika	2022	3	0.544658	1.55851
Species	F. vesca	Mt.Shasta	2022	2.6	0.701447	1.14093
Species	F. vesca	Tienshan.2	2022	3.1	0.741701	1.39815
Species	F. viridis	Iran.1	2022	0.7	3.10167	0.717674
Species	F. viridis	Plauen	2022	0.6	3.71587	0.832828
Species	F. viridis	St.4942B	2022	0.9	3.02835	1.10224
Species	F.bifera	Heimbergfurm.2	2022	1.5	1.74082	0.945562
Species	F.bifera	Zuhzinger	2022	1.5	1.92475	0.900248
Species	F.cascadensis	PacificCrest.10	2022	3.6	0.25	2.6
Species	F.cascadensis	WestBigLake4.4	2022	3.3	0.314724	2.01877
Species	F.chiloensis	2013.8	2022	1	2.51794	0.831155
Species	F.chiloensis	Chile.1	2022	1	2.18229	0.485104
Species	F.chiloensis	USA.1	2022	2.6	0.699047	1.15489
Species	F.iturupensis	F.iturupensis.2020.4	2022	1.8	1.40409	0.950279
Species	F.moschata	Profumata.di.Tortona	2022	3	0.680735	1.52007
Species	F.moschata	Rathenwald.2.1	2022	2.9	1.05795	1.4837
Species	F.nilgerrensis	Dickoré1	2022	3.2	0.904105	1.43195
Species	F.nilgerrensis	Mt.Leigong.1	2022	2.4	0.667988	1.16379
Species	F.nipponica	St.05.6.1	2022	3.1	0.828334	1.65106
Species	F.nubicola	Singalila	2022	2.77778	0.843674	1.64527
Species	F.virginiana	Lac.Diabolo	2022	2.2	0.6608	1.33911
Species	F.virginiana	Montreal5.2.B	2022	2.9	1.0341	1.74652
Species	F.virginiana	Montreal5.4	2022	2.9	0.570077	1.42143
Species	F.virginiana	Rocky.Mountains	2022	3	0.772778	1.53098
Species	F.virginiana	St.08.32	2022	2.4	1.19165	1.3001
Species	F.virginiana	St.Anne1.8	2022	3.1	0.525479	1.59111
cultivars	F.ananassa	141035	2023	1.5	1.42066	0.597211
cultivars	F.ananassa	190128	2023	2.9	0.75563	1.17049
cultivars	F.ananassa	190243	2023	1.2	1.8329	0.582649
cultivars	F.ananassa	190324	2023	1.8	1.40733	0.839755
cultivars	F.ananassa	190349	2023	1.5	1.12628	0.844571
cultivars	F.ananassa	190361	2023	1.8	0.310307	0.688286
cultivars	F.ananassa	190402	2023	1.7	0.723897	0.573011
cultivars	F.ananassa	190417	2023	1.4	1.01237	0.448466
cultivars	F.ananassa	201091	2023	1.77778	0.908971	0.622251
cultivars	F.ananassa	201357	2023	0.8	2.85651	0.798732
cultivars	F.ananassa	201392	2023	1.2	1.73922	0.642982
cultivars	F.ananassa	201401	2023	1.4	1.12196	0.601624
cultivars	F.ananassa	201409	2023	0.7	1.99639	0.437821
cultivars	F.ananassa	201419	2023	2.8	0.353299	1.12887
cultivars	F.ananassa	201438	2023	2.3	0.644508	0.868761
cultivars	F.ananassa	210087	2023	1.2	1.66877	0.74951
cultivars	F.ananassa	210140	2023	1.2	1.30185	0.480217
cultivars	F.ananassa	210706	2023	2.9	0.638588	1.3655
cultivars	F.ananassa	210757	2023	1.4	0.954183	0.565018
cultivars	F.ananassa	90622	2023	2.3	1.09355	0.944332
cultivars	F.ananassa	Asia	2023	1.4	1.19504	0.586022
cultivars	F.ananassa	Bravura	2023	1.3	1.30772	0.504862
cultivars	F.ananassa	Clery	2023	1.4	0.839424	0.456172
cultivars	F.ananassa	Elsanta	2023	1.5	0.47975	0.932216
cultivars	F.ananassa	Elvie2	2023	0.9	1.76106	0.472106
cultivars	F.ananassa	Flair	2023	1.7	0.766051	0.545648
cultivars	F.ananassa	Florentina	2023	0.7	3.0293	0.573858
cultivars	F.ananassa	Lola	2023	0.8	2.12099	0.402269
cultivars	F.ananassa	Malling	2023	1.3	1.61518	0.56576
cultivars	F.ananassa	Rendezvous	2023	1.8	1.04231	0.898851
cultivars	F.ananassa	Sonsation	2023	1.3	0.623017	0.920652

## Sheet: Table 2
WS at 2h (rating)	WS at 4h (rating)	WS at 6h (rating)	Time lag (h)	U (rating/h)
0.9	2.1	3.2	1.35575	1.04802
0.6	1.3	1.6	1.42511	0.568525
1.4	2.4	3.2	0.776929	1.13811
2	3.2	3.7	0.70744	1.50976
1.2	2.4	2.7	1.07549	1.44517
1.3	2.5	3.3	1.0283	1.29529
0.444444	1.55556	3	1.94428	0.958155
1	2.2	2.7	1.42424	1.1398
0.4	1.2	1.5	2.30498	1.01237
2	3	3.7	0.517678	1.29228
1.1	1.9	2.6	0.819991	1.08875
1.5	1.8	2.6	0.888352	1.1936
1	1.8	2.5	0.954227	0.954071
1.4	2.1	2.8	0.694978	1.02934
1	2.11111	3.22222	1.7168	1.0421
1.5	2.4	3.4	0.719632	1.10292
1.5	2.1	2.2	0.811082	1.48541
0.7	1.7	2.4	1.57748	0.977658
1.1	2	2.6	1.00263	1.09535
0.2	0.5	0.9	3.39829	0.563808
1.2	2.1	3.1	0.841653	0.968421
1.4	2	2.6	0.53779	1.12417
1.8	3.2	3.7	0.751054	1.37914
1.1	2.1	2.9	1.03075	0.878418
1.9	2.8	3.6	0.549016	1.23604
0.9	1.9	2.8	0.910241	0.772736
1.9	2.7	3.1	0.79444	1.70406
1.2	1.9	2.1	1.02798	1.2639
1.4	2.4	3.1	0.71909	1.18862
1.4	2.3	2.8	0.745471	1.15053
1.7	2.7	3.5	0.684036	1.25744
1.4	2.4	3.4	0.516851	0.867473
3.5	4	4	0.462627	2
2.9	4	4	0.674217	1.95995
0.6	1.4	1.7	1.74628	1.15266
1.4	2	2.6	0.651441	1.20331
1	1.7	2.3	0.918229	0.772863
1.4	2	2.3	0.809678	1.421
0.5	1	1.5	2.42493	0.836667
1.2	2.2	2.7	0.798772	1.20777
1.3	2.3	3.2	0.736474	1.15055
2	2.9	3.3	0.679333	1.5306
1.7	2.7	3.6	0.548561	1.15544
0.555556	1.33333	2.44444	2.68064	0.92114
1	1.7	2.2	0.789087	0.841594
1.5	2.7	3.3	0.704107	1.25658
1.6	3.1	3.8	0.737614	1.27436
1.6	2.8	3.8	0.673869	1.21956
1.3	2.1	2.6	0.635379	1.11003
1.3	2	2.3	1.44966	1.12734
1.2	2	3.1	1.27717	1.09729
1	1.5	2.1	2.33174	1.18491
1.3	2.2	3.1	1.27699	1.04817
2	3.2	3.7	0.654566	1.40694
1.1	1.9	2.5	1.43839	1.35289
0.111111	0.888889	1.11111	2.31547	0.364541
0.5	1.4	2.2	1.88812	1.01204
0.4	0.9	1.9	2.52745	0.788611
1.4	2.8	3.4	1.01295	1.25009
0.8	1.8	2.7	1.14466	0.771162
1.3	1.4	1.7	1.76199	1.658
1.3	2.1	2.3	0.887929	1.44259
1	1.9	2.2	1.32773	1.48359
1.9	2.6	3.2	0.668932	1.52254
1.2	2.3	3.4	1.04687	1.1738
0.6	1.3	1.9	2.55724	1.19865
1	2.2	3.4	1.30332	1.1714
0.222222	0.444444	1.11111	3.80244	0.711541
0.7	1.5	2.3	1.86457	1.3734
0.7	1.6	3	1.89258	1.03964
0.8	1.8	2.4	1.56379	1.09235
0	0.3	0.8	4.74591	0.763786
0.6	1.2	1.8	1.86331	0.873064
1.22222	2.66667	3.55556	0.92847	1.12649
0.9	1.9	2.8	1.26265	1.09877
0.9	1.8	2.3	1.87945	1.01903
0.9	1.8	2.6	1.04855	0.997395
0.8	1.4	1.9	1.77608	1.00163
0.8	1.6	2.5	1.71915	0.959054
0.7	1.4	2.1	1.98234	0.86999
0.9	1.7	2.5	1.8357	1.10238
0.5	1.9	2.7	1.82843	1.18553
1.5	3.2	3.8	0.982229	1.48752
0.3	1.2	1.8	1.4672	1.26926
0.9	1.8	2.6	0.620003	1.33289
1.6	2.3	3.1	0.340406	1.59336
0.888889	1.77778	2.11111	0.731636	1.38296
1.1	2	3.1	0.722382	0.879652
0.7	1.7	2.7	1.57414	1.11166
1.1	2.2	2.7	1.13621	1.25886
0.9	1.9	2.9	1.25778	1.04923
0.7	1.4	1.8	1.62699	0.996298
0.9	1.8	2	1.64871	1.37115
0.6	1.9	2.7	2.59052	1.65876
0.9	2	2.8	1.31197	0.940325
1.5	2.9	3.6	0.816461	1.29618
0.7	1.3	2.2	2.68594	1.05886
0.9	1.8	2.2	1.63833	1.45183
0.9	2.2	3.5	1.16696	1.0304
1.2	2.1	2.5	0.891935	1.24799
0.6	1.8	2.7	1.43327	0.908853
0.4	1.3	2	2.21966	1.02404
0.9	2.5	3.7	1.34229	1.26644
1.8	3.1	3.8	0.648051	1.42548
0.9	1.7	2.3	0.891973	0.826276
1.1	2.1	3.1	1.1677	1.09597
0.6	1.5	2.3	2.15994	1.19681
0.7	1.9	2.9	1.52996	1.12622
0.333333	1.22222	2.11111	2.97009	0.901137
0.8	2.3	3.5	1.49223	1.28038
0.7	1.5	2.3	1.53176	0.80286
0.8	1.9	3.1	1.7264	1.17753
0.3	1	2.2	2.72669	1.24389
0.8	1.7	2.7	1.75093	1.29333
0.7	2	3	1.72752	1.27425
0.6	1.6	2.3	2.05633	1.20831
1	2.1	3.1	1.17353	1.27264
0.6	1.7	3.1	2.18264	1.19455
0.2	0.9	2.1	2.9894	0.936585
1.4	2.4	3.8	0.76095	1.02176
1.2	2.4	3.5	1.5211	1.3667
1.2	2.1	3.1	0.923193	1.08633
0.6	1.5	2.5	2.07989	1.04546
1	1.6	2.4	1.55998	1.35067
0.3	1.3	3.1	2.7203	1.32484
0.3	1.2	2.2	2.45495	1.21827
0.4	1.4	2.5	2.32358	1.3369
0.7	1.7	2.8	1.57323	0.809708
0.3	1.1	2.2	2.4027	0.970767
1.1	2.4	3.3	0.771875	0.90973
1.5	2.6	3.5	0.729191	1.07547
0.4	1.2	2.5	2.32829	1.14252
1.2	1.8	2.5	0.975565	0.945401
1	1.5	2.3	0.861573	0.896515
0.3	1.1	1.9	2.97419	1.31788
0.4	1	1.9	2.10256	0.88591
0.4	1.2	1.7	2.6426	0.66485
0.4	1	1.8	3.46677	1.19174
0.5	1.6	2.3	2.1435	1.36349
2.11111	3.66667	4	0.77839	1.66833
0.7	2	2.6	1.75798	1.47667
1.1	2.2	2.5	1.14356	1.50494
2.5	3.5	4	0.631377	1.67532
2.2	3.4	3.9	0.722025	1.62517
1.4	3	3.4	1.25596	1.74149
1.3	2.8	3.4	0.998258	1.15439
2.1	3	3.5	0.544658	1.55851
1.5	2.6	3.7	0.701447	1.14093
1.8	3.1	3.7	0.741701	1.39815
0.1	0.7	1.4	3.10167	0.717674
0.1	0.6	1.3	3.71587	0.832828
0.1	0.9	1.9	3.02835	1.10224
0.5	1.5	2.5	1.74082	0.945562
0.7	1.5	2.2	1.92475	0.900248
2.6	3.6	4	0.25	2.6
1.8	3.3	3.9	0.314724	2.01877
0.5	1	1.9	2.51794	0.831155
0.181818	1	1.18182	2.18229	0.485104
1.5	2.6	3.5	0.699047	1.15489
0.9	1.8	2.3	1.40409	0.950279
2	3	3.3	0.680735	1.52007
1.7	2.9	3.5	1.05795	1.4837
1.6	3.2	3.6	0.904105	1.43195
1.4	2.4	3.1	0.667988	1.16379
1.9	3.1	3.5	0.828334	1.65106
1.77778	2.77778	3.22222	0.843674	1.64527
1.5	2.2	2.5	0.6608	1.33911
1.8	2.9	3.3	1.0341	1.74652
2	2.9	3.5	0.570077	1.42143
1.8	3	3.5	0.772778	1.53098
1.4	2.4	3.1	1.19165	1.3001
2.3	3.1	3.9	0.525479	1.59111
0.625	1.5	2.375	1.42066	0.597211
1.3	2.9	3.8	0.75563	1.17049
0.3	1.2	2	1.8329	0.582649
0.6	1.8	3.2	1.40733	0.839755
0.9	1.5	2	1.12628	0.844571
1.2	1.8	2.2	0.310307	0.688286
0.8	1.7	2.3	0.723897	0.573011
0.8	1.4	1.9	1.01237	0.448466
0.888889	1.77778	2.55556	0.908971	0.622251
0.2	0.8	1.4	2.85651	0.798732
0.8	1.2	2.1	1.73922	0.642982
1	1.4	2.4	1.12196	0.601624
0.6	0.7	1.2	1.99639	0.437821
1.9	2.8	3.5	0.353299	1.12887
1.2	2.3	2.7	0.644508	0.868761
0.6	1.2	2.3	1.66877	0.74951
0.5	1.2	1.8	1.30185	0.480217
1.6	2.9	3.8	0.638588	1.3655
0.7	1.4	2.2	0.954183	0.565018
0.9	2.3	3.1	1.09355	0.944332
0.7	1.4	2.5	1.19504	0.586022
0.5	1.3	2.1	1.30772	0.504862
0.8	1.4	2	0.839424	0.456172
0.7	1.5	2.1	0.47975	0.932216
0.4	0.9	1.6	1.76106	0.472106
0.8	1.7	2.5	0.766051	0.545648
0	0.7	1.3	3.0293	0.573858
0.4	0.8	1.1	2.12099	0.402269
0.3	1.3	2.1	1.61518	0.56576
1	1.8	2.3	1.04231	0.898851
0.5	1.3	1.6	0.623017	0.920652

## Sheet: Table 3
Group	species	genotype	year	WS at 4h (rating)	Rate of uptake (mg/h)	Flux x -10^6 (kg m-2 s-1)	permeance x 10^-6(m/s)	log permeance	surface area (cm2)	Firmness (rating)	Osm-potential (MPa)
cultivars	F.ananassa	141033	2022	2.1	128.905	18.9129	2.53722	-12.9903	19.2404	1	-1.07683
cultivars	F.ananassa	141035	2022	1.3	75.148	9.17438	1.25967	-13.6531	22.8353	1	-0.996817
cultivars	F.ananassa	180059	2022	2.4	186.419	15.5212	2.86756	-12.8367	32.1668	3	-0.74897
cultivars	F.ananassa	180217	2022	3.2	341.242	30.9933	5.35414	-12.201	30.7576	1	-0.793601
cultivars	F.ananassa	180606	2022	2.4	104.8	11.6165	1.54071	-13.4516	24.3836	3	-1.03266
cultivars	F.ananassa	190128	2022	2.5	197.025	28.6173	4.03903	-12.5677	19.0242	2	-1.0377
cultivars	F.ananassa	190172	2022	1.55556	137.248	17.8139	3.50258	-12.5781	21.2042	1	-0.694978
cultivars	F.ananassa	190243	2022	2.2	158.885	17.8633	2.83157	-12.9176	25.0724	2	-0.874813
cultivars	F.ananassa	190255	2022	1.2	65.7215	6.91966	1.19164	-13.6697	26.0169	2	-0.79285
cultivars	F.ananassa	190324	2022	3	327.174	29.4745	4.56587	-12.3578	30.6349	1	-0.904277
cultivars	F.ananassa	190349	2022	1.9	112.877	10.5495	1.39627	-13.5934	29.1409	2	-1.01197
cultivars	F.ananassa	190361	2022	1.8	216.326	15.834	2.11526	-13.1216	37.3649	1	-1.00653
cultivars	F.ananassa	190402	2022	1.8	160.041	16.0944	2.49418	-13.0166	28.3185	2	-0.917626
cultivars	F.ananassa	190417	2022	2.1	205.147	16.1601	1.94786	-13.3075	34.6805	1	-1.11159
cultivars	F.ananassa	201091	2022	2.11111	274.082	25.7446	3.80565	-12.6862	29.587	1	-0.952295
cultivars	F.ananassa	201167	2022	2.4	214.827	22.0478	3.29996	-12.7729	27.4105	1	-0.93645
cultivars	F.ananassa	201357	2022	2.1	219.219	14.5059	2.67013	-12.9345	41.4061	1	-0.763562
cultivars	F.ananassa	201392	2022	1.7	230.388	19.6727	2.56787	-13.0569	30.7221	2	-1.0321
cultivars	F.ananassa	201401	2022	2	183.19	17.5829	2.29261	-13.0616	28.7301	1	-1.02398
cultivars	F.ananassa	201409	2022	0.5	93.7215	9.34426	1.26116	-13.6265	27.8413	1	-1.02319
cultivars	F.ananassa	201419	2022	2.1	189.778	19.0563	3.02323	-12.8134	26.8768	1	-0.869254
cultivars	F.ananassa	201438	2022	2	192.516	17.7781	2.87976	-12.8485	30.4413	1	-0.862437
cultivars	F.ananassa	210017	2022	3.2	146.307	13.7244	2.94759	-12.8007	29.0096	3	-0.638238
cultivars	F.ananassa	210035	2022	2.1	91.749	13.4064	2.39384	-13.1763	18.469	3	-0.785316
cultivars	F.ananassa	210056	2022	2.8	205.681	16.0243	2.80202	-12.8194	35.2459	3	-0.775337
cultivars	F.ananassa	210087	2022	1.9	68.675	8.97868	1.70514	-13.308	21.2741	2	-0.729014
cultivars	F.ananassa	210096	2022	2.7	198.767	20.9174	4.69826	-12.3889	26.6046	2	-0.618012
cultivars	F.ananassa	210099	2022	1.9	105.356	11.2565	1.85748	-13.4894	25.591	2	-0.914355
cultivars	F.ananassa	210103	2022	2.4	160.438	14.3955	2.72839	-12.8924	30.5262	2	-0.737522
cultivars	F.ananassa	210140	2022	2.3	112.388	12.7131	1.95046	-13.2206	25.1225	2	-0.913576
cultivars	F.ananassa	210161	2022	2.7	237.211	19.0742	4.3146	-12.4506	34.0445	3	-0.616958
cultivars	F.ananassa	210689	2022	2.4	122.215	14.0403	1.87835	-13.2682	24.896	3	-1.02497
cultivars	F.ananassa	210697	2022	4	335.485	45.0678	6.16975	-12.0219	20.6062	3	-1.02993
cultivars	F.ananassa	210706	2022	4	222.41	28.4232	4.60159	-12.3643	21.9099	1	-0.871761
cultivars	F.ananassa	210726	2022	1.4	102.05	9.41685	1.7546	-13.3422	30.7399	1	-0.751002
cultivars	F.ananassa	210727	2022	2	154.278	12.8602	2.60658	-12.9081	33.2599	1	-0.682184
cultivars	F.ananassa	210738	2022	1.7	93.4005	9.92529	1.91211	-13.4616	26.7698	1	-0.754167
cultivars	F.ananassa	210745	2022	2	142.867	15.7167	2.58311	-12.988	26.202	2	-0.835497
cultivars	F.ananassa	210757	2022	1	123.097	10.3246	1.73049	-13.3698	33.245	2	-0.792072
cultivars	F.ananassa	210764	2022	2.2	140.314	11.5067	2.71884	-12.9098	34.1192	2	-0.598934
cultivars	F.ananassa	210789	2022	2.3	188.624	16.4535	3.09826	-12.8103	31.6625	1	-0.74308
cultivars	F.ananassa	210795	2022	2.9	253.869	23.6828	4.69528	-12.5047	30.3245	3	-0.776983
cultivars	F.ananassa	34-20-7C	2022	2.7	188.763	19.3359	3.03056	-12.7586	27.0265	1	-0.899887
cultivars	F.ananassa	90622	2022	1.33333	168.602	17.998	3.52687	-12.7266	24.898	2	-0.717107
cultivars	F.ananassa	94025	2022	1.7	81.8145	10.584	1.67478	-13.3161	21.1845	1	-0.861714
cultivars	F.ananassa	Asia	2022	2.7	289.746	21.4089	4.36876	-12.4029	37.9755	2	-0.668943
cultivars	F.ananassa	Bravura	2022	3.1	134.866	19.6986	2.92908	-12.7984	18.8128	1	-0.935335
cultivars	F.ananassa	cerafine	2022	2.8	78.3035	14.0108	2.15202	-13.0919	15.4725	2	-0.918093
cultivars	F.ananassa	Clery	2022	2.1	176.388	14.2626	1.90106	-13.3151	33.6766	2	-1.03741
cultivars	F.ananassa	Dahli	2022	2	244.77	19.9799	2.82527	-13.0327	34.7551	2	-0.993188
cultivars	F.ananassa	Elsanta	2022	2	158.25	14.5822	2.28411	-13.0321	29.5001	1	-0.838371
cultivars	F.ananassa	Elvie2	2022	1.5	136.464	14.1613	2.2295	-13.3423	25.5016	2	-0.891584
cultivars	F.ananassa	Faith	2022	2.2	176.557	15.3877	2.83216	-12.861	31.1723	2	-0.747137
cultivars	F.ananassa	Flair	2022	3.2	225.287	22.6135	3.47276	-12.6221	27.1867	2	-0.893891
cultivars	F.ananassa	Florentina	2022	1.9	81.3	8.08344	1.45214	-13.5581	27.3964	1	-0.794334
cultivars	F.ananassa	Lola	2022	0.888889	68.2044	5.46429	1.0093	-13.8214	34.3665	2	-0.740763
cultivars	F.ananassa	Malling	2022	1.4	107.652	11.1277	2.07296	-13.1206	26.4662	2	-0.739647
cultivars	F.ananassa	Marieka	2022	0.9	205.415	15.9486	2.23116	-13.3231	33.7655	1	-0.986507
cultivars	F.ananassa	Renaissance	2022	2.8	236.21	26.6395	4.14869	-12.5662	23.6829	1	-0.932349
cultivars	F.ananassa	Rendezvous	2022	1.8	170.181	15.7245	1.90115	-13.215	29.9981	2	-1.13003
cultivars	F.ananassa	Silvia	2022	1.4	128.398	14.249	1.81275	-13.42	26.1346	2	-1.04872
cultivars	F.ananassa	Sonata	2022	2.1	110.783	10.9899	1.66503	-13.4043	27.0235	2	-0.890333
cultivars	F.ananassa	Sonsation	2022	1.9	99.3955	9.49452	1.61902	-13.5181	29.242	2	-0.827412
cultivars	F.ananassa	vicontesse	2022	2.6	109.148	22.8246	3.3284	-12.6588	13.1243	3	-0.929773
F2	F.ana.chilo	CS-001	2022	2.3	73.3465	21.2516	2.21856	-13.0794	9.73399	2	-1.34201
F2	F.ana.chilo	CS-002	2022	1.3	68.289	16.6761	2.03227	-13.1423	11.083	2	-1.1088
F2	F.ana.chilo	CS-004	2022	2.2	118.843	32.4303	4.75303	-12.3175	10.0966	1	-0.95203
F2	F.ana.chilo	CS-008	2022	0.444444	35.9978	13.1651	1.43913	-13.4844	7.42569	1	-1.23084
F2	F.ana.chilo	CS-009	2022	1.5	34.021	13.2556	1.58419	-13.4357	7.34668	2	-1.18814
F2	F.ana.chilo	CS-011	2022	1.6	53.5125	18.1833	2.36334	-13.0293	8.04177	2	-1.08664
F2	F.ana.chilo	CS-012	2022	1.8	29.3865	9.2677	1.21007	-13.6604	8.63475	2	-1.03434
F2	F.ana.chilo	CS-013	2022	0.3	35.974	10.1653	1.14097	-13.7036	9.74759	1	-1.2162
F2	F.ana.chilo	CS-015	2022	1.2	36.7385	10.74	1.00017	-13.8824	9.45972	2	-1.46311
F2	F.ana.chilo	CS-017	2022	2.66667	75.045	24.3436	3.58861	-12.6296	8.55851	2	-0.960335
F2	F.ana.chilo	CS-021	2022	1.9	42.791	19.0973	2.46323	-12.9628	6.04078	1	-1.05614
F2	F.ana.chilo	CS-022	2022	1.8	34.484	14.3279	1.59012	-13.4873	6.78825	1	-1.31346
F2	F.ana.chilo	CS-023	2022	1.8	54.8385	18.5658	2.18766	-13.0574	8.39124	2	-1.18444
F2	F.ana.chilo	CS-027	2022	1.4	37.973	8.47564	1.11236	-13.7935	12.1116	2	-1.09086
F2	F.ana.chilo	CS-028	2022	1.6	45.3005	14.2015	1.58202	-13.4644	8.47272	2	-1.27789
F2	F.ana.chilo	CS-029	2022	1.4	27.708	9.0386	0.849517	-14.0792	8.08275	2	-1.50112
F2	F.ana.chilo	CS-030	2022	1.7	35.1545	12.1747	1.35751	-13.6594	8.85227	2	-1.36359
F2	F.ana.chilo	CS-032	2022	1.9	29.7365	10.4707	1.78168	-13.2782	7.66316	2	-0.800417
F2	F.ana.chilo	CS-033	2022	3.2	46.95	17.7126	2.68493	-12.8611	7.44801	3	-0.926075
F2	F.ana.chilo	CS-034	2022	1.2	21.8064	7.59082	0.915751	-13.9351	8.03846	2	-1.11844
F2	F.ana.chilo	CS-035	2022	1.8	80.3176	22.7755	2.6384	-12.9095	9.4993	1	-1.1899
F2	F.ana.chilo	CS-036	2022	2.3	67.2256	17.2478	1.92109	-13.3259	10.463	2	-1.2052
F2	F.ana.chilo	CS-037	2022	1.77778	64.7983	16.0597	2.09635	-13.0986	11.4335	2	-1.05734
F2	F.ana.chilo	CS-038	2022	2	17.9085	7.27197	0.754993	-14.1368	7.10411	3	-1.32771
F2	F.ana.chilo	CS-039	2022	1.7	63.5365	11.0106	1.33188	-13.595	15.5918	2	-1.15183
F2	F.ana.chilo	CS-040	2022	2.2	68.8085	14.6918	1.9402	-13.1764	13.1611	2	-1.04064
F2	F.ana.chilo	CS-041	2022	1.9	51.2565	15.6585	1.65304	-13.3617	9.32254	2	-1.30391
F2	F.ana.chilo	CS-042	2022	1.4	47.2815	12.8594	1.16252	-13.6874	10.3714	1	-1.51728
F2	F.ana.chilo	CS-043	2022	1.8	42.8105	11.6074	1.06641	-13.8788	10.3531	1	-1.48849
F2	F.ana.chilo	CS-045	2022	1.9	38.015	17.1003	2.35045	-12.9693	6.1942	2	-0.989796
F2	F.ana.chilo	CS-046	2022	2	34.65	10.7269	1.01656	-13.8472	8.88918	1	-1.43686
F2	F.ana.chilo	CS-047	2022	2.9	53.0935	20.5436	2.85184	-12.8388	7.17032	2	-1.05211
F2	F.ana.chilo	CS-048	2022	1.3	19.6735	6.87182	0.770333	-14.194	7.84102	1	-1.22518
F2	F.ana.chilo	CS-049	2022	1.8	50.126	14.3592	1.57999	-13.3942	9.66422	1	-1.24478
F2	F.ana.chilo	CS-052	2022	2.2	48.1495	15.5424	1.82807	-13.2462	8.58043	2	-1.18132
F2	F.ana.chilo	CS-053	2022	2.1	33.6835	11.3938	1.59116	-13.5052	8.98704	2	-1.14449
F2	F.ana.chilo	CS-055	2022	1.8	30.3685	10.9327	1.51027	-13.4401	7.82889	2	-1.01466
F2	F.ana.chilo	CS-057	2022	1.3	34.2805	7.97836	0.917723	-13.9161	12.1466	1	-1.17397
F2	F.ana.chilo	CS-059	2022	2.5	70.19	23.4387	2.77288	-12.845	8.28942	3	-1.19358
F2	F.ana.chilo	CS-061	2022	3.1	83.5019	25.7704	2.84435	-12.8371	9.08482	3	-1.25104
F2	F.ana.chilo	CS-062	2022	1.7	38.596	11.7361	1.08568	-13.7746	9.09589	2	-1.48882
F2	F.ana.chilo	CS-063	2022	2.1	59.1175	16.8825	1.45946	-13.5357	9.48473	2	-1.61852
F2	F.ana.chilo	CS-064	2022	1.5	33.943	11.2635	1.63593	-13.4924	9.13161	1	-1.04788
F2	F.ana.chilo	CS-065	2022	1.9	53.379	13.6447	1.55943	-13.4518	11.5221	2	-1.24365
F2	F.ana.chilo	CS-066	2022	1.22222	33.375	10.6593	1.16048	-13.7071	8.56097	1	-1.25648
F2	F.ana.chilo	CS-068	2022	2.3	49.076	16.6864	2.39537	-12.9784	8.3075	1	-0.959403
F2	F.ana.chilo	CS-069	2022	1.5	39.926	13.976	1.8028	-13.3547	7.60317	1	-1.09283
F2	F.ana.chilo	CS-071	2022	1.9	61.013	18.4528	2.2576	-13.1252	9.21848	1	-1.20213
F2	F.ana.chilo	CS-072	2022	1	30.698	13.7402	1.73434	-13.28	6.19055	1	-1.09075
F2	F.ana.chilo	CS-073	2022	1.7	47.674	18.6119	2.01508	-13.1904	7.02275	3	-1.28036
F2	F.ana.chilo	CS-074	2022	2	40.612	13.6734	1.38747	-13.5529	8.50031	2	-1.38425
F2	F.ana.chilo	CS-075	2022	1.6	50.9535	18.8202	3.11602	-12.7248	6.95989	1	-0.820429
F2	F.ana.chilo	CS-076	2022	2.1	61.4185	20.6844	2.66188	-12.8875	8.20233	2	-1.05548
F2	F.ana.chilo	CS-077	2022	1.7	31.002	10.9671	1.09309	-13.8171	7.3246	2	-1.39025
F2	F.ana.chilo	CS-078	2022	0.9	40.073	12.5293	1.36428	-13.54	8.81355	1	-1.25353
F2	F.ana.chilo	CS-079	2022	2.4	57.6715	16.5248	1.94659	-13.1818	9.25838	3	-1.14701
F2	F.ana.chilo	CS-081	2022	2.4	116.787	37.0212	5.15293	-12.2261	8.66798	2	-0.998928
F2	F.ana.chilo	CS-082	2022	2.1	61.733	16.5864	2.01628	-13.1577	10.483	1	-1.1629
F2	F.ana.chilo	CS-083	2022	1.5	22.3985	6.98553	0.823497	-14.1015	9.15241	2	-1.17497
F2	F.ana.chilo	CS-084	2022	1.6	24.254	10.5053	1.55146	-13.4392	6.37145	2	-0.940506
F2	F.ana.chilo	CS-086	2022	1.3	47.773	19.3384	2.56423	-12.9667	6.81271	2	-1.07417
F2	F.ana.chilo	CS-087	2022	1.2	56.2495	16.2368	1.71681	-13.343	9.44364	2	-1.30464
F2	F.ana.chilo	CS-088	2022	1.4	34.863	13.8556	1.74544	-13.2859	6.87418	2	-1.09616
F2	F.ana.chilo	CS-089	2022	1.7	55.9115	14.987	1.81153	-13.3076	10.0104	2	-1.13757
F2	F.ana.chilo	CS-090	2022	1.1	22.2705	8.95956	1.11148	-13.7275	6.9961	2	-1.11006
F2	F.ana.chilo	CS-092	2022	2.4	42.7385	14.639	1.91303	-13.2025	7.97637	1	-1.04821
F2	F.ana.chilo	CS-093	2022	2.6	38.4295	24.8296	3.05751	-12.7625	4.33981	3	-1.1249
F2	F.ana.chilo	CS-094	2022	1.2	37.1175	15.6733	1.75596	-13.3213	7.23072	2	-1.2096
F2	F.ana.chilo	CS-097	2022	1.8	56.0895	24.0546	3.17608	-12.7317	6.38565	1	-1.0181
F2	F.ana.chilo	CS-101	2022	1.5	42.646	16.2165	1.56718	-13.4703	6.84124	2	-1.3896
F2	F.ana.chilo	CS-103	2022	1.1	36.0915	14.6354	1.7889	-13.3174	6.82099	1	-1.18947
F2	F.ana.chilo	CS-104	2022	1	25.21	10.8367	1.31576	-13.6647	6.56359	2	-1.24716
F2	F.ana.chilo	P-90999	2022	1.2	45.2085	11.2558	0.987014	-13.8945	10.9604	1	-1.55898
F2	F.ana.chilo	SengaS-F1	2022	1	65.288	10.3602	1.60761	-13.5561	17.1542	1	-0.931882
F2	F.ana.chilo	SengaS2-F2	2022	1.6	37.647	9.99833	1.73614	-13.2883	10.3185	2	-0.776515
F2	F.ana.chilo	USA1	2022	3.66667	43.6378	22.3691	2.97517	-12.7601	5.34765	3	-1.03784
Species	F. mandshurica	Baegdusan	2022	2	40.9565	20.0544	2.05139	-13.152	5.66462	2	-1.3673
Species	F. mandshurica	Changshai.M	2022	2.2	43.8085	20.9021	2.7659	-12.8347	5.84674	2	-1.03784
Species	F. vesca	BailalSt94.13	2022	3.5	42.595	40.6961	5.69931	-12.1047	2.92251	3	-1.01432
Species	F. vesca	CFRA.371.001	2022	3.4	81.2735	35.8685	5.44689	-12.292	6.41752	3	-0.928824
Species	F. vesca	CFRA989.001	2022	3	72.4985	26.7007	3.26953	-12.7141	7.51562	3	-1.13117
Species	F. vesca	F.Eibenstack	2022	2.8	55.49	27.0497	3.15146	-12.7932	5.56234	2	-1.23603
Species	F. vesca	Korsika	2022	3	39.3005	21.642	2.4518	-12.9674	5.02439	2	-1.23696
Species	F. vesca	Mt.Shasta	2022	2.6	40.575	24.0002	2.49297	-13.0334	4.54655	2	-1.36312
Species	F. vesca	Tienshan.2	2022	3.1	61.501	34.8722	4.47819	-12.3735	4.86593	3	-1.1311
Species	F. viridis	Iran.1	2022	0.7	15.0545	6.30595	0.548776	-14.4326	6.6945	1	-1.58961
Species	F. viridis	Plauen	2022	0.6	20.0135	7.60069	0.493083	-14.5723	7.28503	1	-2.138
Species	F. viridis	St.4942B	2022	0.9	26.889	13.1156	0.94334	-13.9015	5.71836	1	-1.95458
Species	F.bifera	Heimbergfurm.2	2022	1.5	22.2475	15.2284	1.29566	-13.5812	4.15799	2	-1.63541
Species	F.bifera	Zuhzinger	2022	1.5	21.8815	14.9622	1.87344	-13.4617	4.27386	2	-1.21919
Species	F.cascadensis	PacificCrest.10	2022	3.6	33.752	25.3861	4.0853	-12.4224	3.72731	2	-0.867858
Species	F.cascadensis	WestBigLake4.4	2022	3.3	60.2107	36.5279	6.09889	-12.0436	4.51338	2	-0.831282
Species	F.chiloensis	2013.8	2022	1	101.847	11.1719	1.32661	-13.6276	24.7341	2	-1.18593
Species	F.chiloensis	Chile.1	2022	1	24.7064	5.22771	0.699694	-14.1838	13.1953	1	-1.02412
Species	F.chiloensis	USA.1	2022	2.6	46.5225	15.8293	1.70367	-13.3956	8.08334	2	-1.29407
Species	F.iturupensis	F.iturupensis.2020.4	2022	1.8	40.7455	11.8389	1.58608	-13.4235	8.99095	2	-1.03323
Species	F.moschata	Profumata.di.Tortona	2022	3	65.835	17.822	3.26581	-12.6836	10.3208	3	-0.763864
Species	F.moschata	Rathenwald.2.1	2022	2.9	60.1265	21.1501	2.49718	-13.016	8.06631	3	-1.19266
Species	F.nilgerrensis	Dickoré1	2022	3.2	55.351	28.9252	4.83345	-12.2594	5.29722	2	-0.823886
Species	F.nilgerrensis	Mt.Leigong.1	2022	2.4	26.7525	15.8254	2.00028	-13.132	4.68246	2	-1.08763
Species	F.nipponica	St.05.6.1	2022	3.1	22.659	17.0265	3.15259	-12.6917	3.79732	3	-0.741824
Species	F.nubicola	Singalila	2022	2.77778	38.6006	14.9718	2.25662	-13.0775	7.15975	3	-0.939867
Species	F.virginiana	Lac.Diabolo	2022	2.2	24.248	13.9959	1.66442	-13.3476	4.83302	3	-1.15636
Species	F.virginiana	Montreal5.2.B	2022	2.9	33.029	16.8193	1.65957	-13.3629	5.27054	2	-1.4118
Species	F.virginiana	Montreal5.4	2022	2.9	27.32	14.6768	1.68723	-13.362	5.07427	2	-1.23112
Species	F.virginiana	Rocky.Mountains	2022	3	19.514	17.2242	2.40829	-12.9648	3.15117	2	-1.01642
Species	F.virginiana	St.08.32	2022	2.4	30.6595	20.2208	2.39054	-13.0509	4.33161	2	-1.22144
Species	F.virginiana	St.Anne1.8	2022	3.1	21.6775	11.0124	1.19085	-13.6856	5.36508	3	-1.29382
cultivars	F.ananassa	141035	2023	1.5	99.1825	13.7577	1.7189	-13.3812	19.9357	1	-1.09142
cultivars	F.ananassa	190128	2023	2.9	319.179	28.6482	4.08513	-12.4706	30.7393	3	-0.98138
cultivars	F.ananassa	190243	2023	1.2	118.883	11.506	2.396	-12.9567	28.8954	3	-0.65825
cultivars	F.ananassa	190324	2023	1.8	236.416	20.8945	3.24579	-12.6984	31.4076	2	-0.898504
cultivars	F.ananassa	190349	2023	1.5	167.61	14.3965	2.52246	-13.0033	32.1592	3	-0.799767
cultivars	F.ananassa	190361	2023	1.8	241.158	17.599	2.40711	-13.0441	38.1734	2	-0.999097
cultivars	F.ananassa	190402	2023	1.7	234.989	19.7393	2.9085	-12.7718	33.2162	3	-0.939598
cultivars	F.ananassa	190417	2023	1.4	188.803	13.3058	2.13986	-13.1652	39.2104	2	-0.863641
cultivars	F.ananassa	201091	2023	1.77778	275.285	24.6891	2.97565	-12.8462	29.5547	1	-1.14259
cultivars	F.ananassa	201357	2023	0.8	114.134	8.88365	1.9596	-13.1842	35.7832	1	-0.628284
cultivars	F.ananassa	201392	2023	1.2	195.064	16.9382	2.92478	-12.8749	32.4722	2	-0.749892
cultivars	F.ananassa	201401	2023	1.4	284.341	21.8583	2.94497	-12.9323	36.4871	3	-1.08979
cultivars	F.ananassa	201409	2023	0.7	211.286	14.555	1.78863	-13.2481	40.2613	1	-1.11127
cultivars	F.ananassa	201419	2023	2.8	407.731	35.8418	5.07585	-12.2085	31.5533	1	-0.96977
cultivars	F.ananassa	201438	2023	2.3	316.387	21.6808	3.48308	-12.6154	40.8001	1	-0.873725
cultivars	F.ananassa	210087	2023	1.2	126.275	10.8366	2.00561	-13.128	32.7073	3	-0.733881
cultivars	F.ananassa	210140	2023	1.2	82.593	6.89004	1.38224	-13.5685	32.9011	2	-0.706013
cultivars	F.ananassa	210706	2023	2.9	178.696	21.2742	3.37291	-12.6613	23.5613	3	-0.886114
cultivars	F.ananassa	210757	2023	1.4	87.721	8.10619	1.70424	-13.311	30.0369	2	-0.652111
cultivars	F.ananassa	90622	2023	2.3	186.807	19.2674	3.28628	-12.7177	26.5766	2	-0.809486
cultivars	F.ananassa	Asia	2023	1.4	160.221	13.3371	2.71648	-12.8341	33.049	3	-0.673821
cultivars	F.ananassa	Bravura	2023	1.3	134.508	9.70528	1.40085	-13.5016	38.5477	2	-0.932092
cultivars	F.ananassa	Clery	2023	1.4	101.752	8.491	1.45978	-13.6755	34.2342	2	-0.811088
cultivars	F.ananassa	Elsanta	2023	1.5	314.52	25.5453	4.11438	-12.5237	33.3429	2	-0.826793
cultivars	F.ananassa	Elvie2	2023	0.9	65.6705	6.03319	0.973042	-13.8803	30.514	3	-0.852675
cultivars	F.ananassa	Flair	2023	1.7	131.565	15.4725	2.27149	-13.0543	23.0093	1	-0.939692
cultivars	F.ananassa	Florentina	2023	0.7	67.076	5.46945	0.975381	-13.9149	34.2247	2	-0.784476
cultivars	F.ananassa	Lola	2023	0.8	113.912	8.41399	1.38151	-13.5068	37.8648	1	-0.839279
cultivars	F.ananassa	Malling	2023	1.3	163.695	13.1435	2.03079	-13.1619	34.7472	1	-0.901706
cultivars	F.ananassa	Rendezvous	2023	1.8	195.137	18.0368	2.7311	-12.8714	30.3077	2	-0.917757
cultivars	F.ananassa	Sonsation	2023	1.3	224.39	20.1382	2.96061	-12.9706	31.1464	2	-0.934456

## Sheet: Table 4
Group	species	genotype	WS at 4h (rating)	Time lag (h)	U (rating/h)	permeance x 10^-6(m/s)
Species	F. mandshurica	Baegdusan	2	1.75798	1.47667	2.05139
Species	F. mandshurica	Changshai.M	2.2	1.14356	1.50494	2.7659
Species	F. vesca	BailalSt94.13	3.5	0.631377	1.67532	5.69931
Species	F. vesca	CFRA.371.001	3.4	0.722025	1.62517	5.44689
Species	F. vesca	CFRA989.001	3	1.25596	1.74149	3.26953
Species	F. vesca	F.Eibenstack	2.8	0.998258	1.15439	3.15146
Species	F. vesca	Korsika	3	0.544658	1.55851	2.4518
Species	F. vesca	Mt.Shasta	2.6	0.701447	1.14093	2.49297
Species	F. vesca	Tienshan.2	3.1	0.741701	1.39815	4.47819
Species	F. viridis	Iran.1	0.7	3.10167	0.717674	0.548776
Species	F. viridis	Plauen	0.6	3.71587	0.832828	0.493083
Species	F. viridis	St.4942B	0.9	3.02835	1.10224	0.94334
Species	F.bifera	Heimbergfurm.2	1.5	1.74082	0.945562	1.29566
Species	F.bifera	Zuhzinger	1.5	1.92475	0.900248	1.87344
Species	F.cascadensis	PacificCrest.10	3.6	0.25	2.6	4.0853
Species	F.cascadensis	WestBigLake4.4	3.3	0.314724	2.01877	6.09889
Species	F.chiloensis	2013.8	1	2.51794	0.831155	1.32661
Species	F.chiloensis	Chile.1	1	2.18229	0.485104	0.699694
Species	F.chiloensis	USA.1	2.6	0.699047	1.15489	1.70367
Species	F.iturupensis	F.iturupensis.2020.4	1.8	1.40409	0.950279	1.58608
Species	F.moschata	Profumata.di.Tortona	3	0.680735	1.52007	3.26581
Species	F.moschata	Rathenwald.2.1	2.9	1.05795	1.4837	2.49718
Species	F.nilgerrensis	Dickoré1	3.2	0.904105	1.43195	4.83345
Species	F.nilgerrensis	Mt.Leigong.1	2.4	0.667988	1.16379	2.00028
Species	F.nipponica	St.05.6.1	3.1	0.828334	1.65106	3.15259
Species	F.nubicola	Singalila	2.77778	0.843674	1.64527	2.25662
Species	F.virginiana	Lac.Diabolo	2.2	0.6608	1.33911	1.66442
Species	F.virginiana	Montreal5.2.B	2.9	1.0341	1.74652	1.65957
Species	F.virginiana	Montreal5.4	2.9	0.570077	1.42143	1.68723
Species	F.virginiana	Rocky.Mountains	3	0.772778	1.53098	2.40829
Species	F.virginiana	St.08.32	2.4	1.19165	1.3001	2.39054
Species	F.virginiana	St.Anne1.8	3.1	0.525479	1.59111	1.19085

## Sheet: Table 5
Genotype	WS at 4h (rating)	Time lag (h)	U (rating/h)	permeance x 10^-6(m/s)	Osm-potential (MPa)		Genotype	CM (g/m2)		Genotype	Firmness (N)
CAMAROSA	3	0.53002	1.36794	4.25896	-0.885769		AMIGA	1.14592		CHANDLER	3.1392
CAMAROSA	3	0.53002	1.36794	3.46483	-0.949683		AMIGA	0.763944		CHANDLER	3.1392
CAMAROSA	2	0.886074	0.646251	1.94612	-1.18146		AMIGA	0.63662		CHANDLER	2.5506
CAMAROSA	1	2.56786	0.608394	1.95023	-0.96272		AMIGA	0.748028		CHANDLER	3.3354
CAMAROSA	2	0.886074	0.646251	3.86155	-0.654244		AMIGA	0.763944		CHANDLER	2.7468
CAMAROSA	3	1.14359	1.15701	3.69921	-0.741849		AMIGA	0.732113		CHANDLER	3.5316
CAMAROSA	0	6.95805	0.960627	0.5604	-0.96272		AMIGA	0.827606		CHANDLER	3.4335
CAMAROSA	0	4.83702	0.864404	1.11841	-0.800094		AMIGA	1.01859		CHANDLER	3.6297
CAMAROSA	1	3.26788	1.37311	1.04136	-0.860821		CHANDLER	1.08225		CHANDLER	3.924
CAMAROSA	1	3.26788	1.37311	1.42913	-0.87325		CHANDLER	1.60746		CHANDLER	3.0411
AMIGA	1	2.69129	0.378783	1.47537	-0.686256		CHANDLER	1.40056		CHANDLER	3.8259
AMIGA	0	6.05603	0.51433	1.53071	-0.623286		CHANDLER	1.19366		CHANDLER	2.2563
AMIGA	0	6.05603	0.51433	1.78134	-0.730513		CHANDLER	1.52789		CHANDLER	3.3354
AMIGA	1	2.69129	0.378783	0.969288	-0.800094		CHANDLER	1.28916		CHANDLER	3.6297
AMIGA	0	6.05603	0.51433	0.737702	-0.6648		CHANDLER	1.52789		CHANDLER	2.6487
AMIGA	0	6.05603	0.51433	0.626324	-0.730513		CHANDLER	1.38465		CHANDLER	3.4335
AMIGA	0	6.5887	0.702097	1.94241	-0.603251		PGII-8	1.16183		CHANDLER	3.1392
AMIGA	0	6.05603	0.51433	0.899893	-0.730513		PGII-8	0.732113		CHANDLER	2.0601
AMIGA	0	6.05603	0.51433	0.609074	-0.730513		PGII-8	0.875352		CHANDLER	3.1392
AMIGA	0	6.05603	0.51433	1.21441	-0.6648		PGII-8	0.732113		CHANDLER	3.1392
PGII-8	4	0.889102	1.81011	4.45058	-0.603251		PGI/II-16	1.30507		CHANDLER	2.5506
PGII-8	3	1.14359	1.15701	3.18434	-0.800094		PGI/II-16	1.5438		CHANDLER	3.3354
PGII-8	2	2.40872	1.26367	1.5219	-0.824097		PGI/II-16	1.17775		CHANDLER	2.7468
PGII-8	4	0.889102	1.81011	4.29244	-0.730513		PGI/II-16	0.95493		CHANDLER	3.5316
PGII-8	0	6.95805	0.960627	0.295025	-0.949683		PGI/II-16	1.24141		CHANDLER	3.4335
PGII-8	1	1.83176	0.37695	0.743233	-0.730513		PGI-29	1.98944		CHANDLER	3.6297
PGII-8	4	0.889102	1.81011	5.72483	-0.686256		PGI-29	1.67113		CHANDLER	3.924
PGII-8	4	0.663881	2	4.52047	-0.824097		PGI-29	1.36873		CHANDLER	3.0411
PGII-8	2	0.890413	0.6468	1.07674	-0.923859		PGI-29	1.55972		CHANDLER	3.8259
PGII-8	2	0.493813	1.39412	1.19663	-0.949683		PGI-29	1.67113		CHANDLER	2.2563
PGI-29	0	6.05603	0.51433	1.17623	-0.603251		PGI-29	1.43239		CHANDLER	3.3354
PGI-29	2	0.25	0.536226	4.01434	-0.493828					CHANDLER	3.6297
PGI-29	0	5.70869	0.877598	3.19819	-0.493828					CHANDLER	2.6487
PGI-29	1	2.28712	0.578482	1.98787	-0.623286					CHANDLER	3.4335
PGI-29	1	2.28712	0.578482	2.63901	-0.564678					CHANDLER	3.1392
PGI-29	0	12.8156	0.205476	0.90363	-0.753291					CHANDLER	2.0601
PGI-29	1	2.69129	0.378783	1.1302	-0.730513					PGII-8	4.0221
PGI-29	2	0.25	0.536226	2.32071	-0.623286					PGII-8	4.0221
PGI-29	1	2.28712	0.578482	2.0244	-0.623286					PGII-8	3.5316
PGI-29	1	2.28712	0.578482	1.60083	-0.623286					PGII-8	3.8259
PGI-29	1	2.69129	0.378783	1.1727	-0.776489					PGII-8	4.1202
PGI/II-16	2	2.17191	1.09997	1.78878	-0.975838					PGII-8	3.2373
PGI/II-16	3	1.14423	1.15727	2.87139	-0.730513					PGII-8	2.4525
PGI/II-16	4	0.889102	1.81011	3.59508	-0.975838					PGII-8	3.5316
PGI/II-16	3	1.49452	1.97802	1.7058	-0.686256					PGII-8	3.924
PGI/II-16	4	0.889102	1.81011	4.10427	-0.686256					PGII-8	3.4335
PGI/II-16	1	2.12309	0.527927	1.26009	-0.848486					PGII-8	2.4525
PGI/II-16	0	4.83702	0.864404	0.662126	-0.848486					PGII-8	3.924
PGI/II-16	1	1.83176	0.37695	0.667622	-1.05618					PGII-8	3.6297
PGI/II-16	2	0.6593	0.739069	2.33416	-0.949683					PGII-8	3.7278
PGI/II-16	1	2.14817	0.535076	1.13786	-1.0291					PGII-8	3.5316
CHANDLER	1	2.69129	0.378783	1.57437	-0.730513					PGII-8	2.6487
CHANDLER	1	2.69129	0.378783	1.61354	-0.603251					PGII-8	3.1392
CHANDLER	1	3.20593	1.25913	1.66636	-0.643806					PGII-8	4.5126
CHANDLER	2	0.25	0.536226	2.14277	-0.564678					PGII-8	3.6297
CHANDLER	2	0.283937	0.58156	1.85501	-0.493828					PGII-8	3.5316
CHANDLER	1	0.25	0.264232	0.590218	-0.788241					PGI/II-16	4.0221
CHANDLER	0	6.5887	0.702097	0.713569	-0.708164					PGI/II-16	5.0031
CHANDLER	1	2.69129	0.378783	1.4803	-0.623286					PGI/II-16	5.0031
CHANDLER	1	2.69129	0.378783	1.53884	-0.623286					PGI/II-16	5.2974
CHANDLER	1	2.28712	0.578482	0.857161	-0.730513					PGI/II-16	5.2974
CHANDLER	1	2.69129	0.378783	0.802039	-0.708164					PGI/II-16	5.6898
										PGI/II-16	5.9841
										PGI/II-16	3.4335
										PGI/II-16	4.4145
										PGI/II-16	3.924
										PGI/II-16	3.924
										PGI-29	4.7088
										PGI-29	3.5316
										PGI-29	3.5316
										PGI-29	4.2183
										PGI-29	4.1202
										PGI-29	4.5126
										PGI-29	3.6297
										PGI-29	4.8069
										PGI-29	4.4145
										PGI-29	3.5316
										PGI-29	4.5126
										PGI-29	4.0221
										PGI-29	3.0411
										AMIGA	3.924
										AMIGA	4.2183
										AMIGA	4.1202
										AMIGA	4.0221
										AMIGA	5.0031
										AMIGA	5.5917
										AMIGA	5.5917
										AMIGA	4.8069
										AMIGA	5.5917
										AMIGA	5.886
										AMIGA	4.905
										AMIGA	4.0221
										AMIGA	5.2974

## Sheet: Table 6
cultivar	CM (mg per fruit)	DCM(mg per fruit)	Wax (mg per fruit)	WS at 4h (rating)	permeance x 10^-6(m/s)
210087	1.08348	0.880326	0.203152	2.7	1.70514
201091	1.61869	1.21255	0.406144	2.11111	3.80565
34-20-7C	1.46725	1.21873	0.248525	2	3.03056
Elvie2	1.51331	1.30458	0.208733	1.5	2.2295
141033	1.5556	1.26775	0.287847	2.1	2.53722
201419	1.26426	1.05989	0.204373	1.9	3.02323
210764	2.24812	1.80827	0.439849	1.9	2.71884
190243	1.58119	1.43155	0.14964	2.2	2.83157
201167	1.67521	1.43091	0.244301	2.4	3.29996
190349	1.66037	1.33572	0.324654	2.4	1.39627
190417	1.74786	1.45349	0.294377	1.8	1.94786
190361	1.97731	1.73201	0.245306	1.8	2.11526
201438	1.42116	1.16277	0.272524	2.1	2.87976
210795	1.52296	1.27629	0.246677	2.2	4.69528
180059	1.7065	1.5131	0.193404	1.9	2.86756
201409	1.50657	1.30717	0.199399	0.5	1.26116
Lola	1.86748	1.47679	0.390686	0.888889	1.0093
210726	1.54383	1.26659	0.277236	1.4	1.7546
Silvia	1.32582	1.18024	0.145581	2	1.81275
Sonsation	1.22556	0.969585	0.25597	2.9	1.61902
190402	1.9831	1.6626	0.3205	1.9	2.49418
rendezvous	1.73667	1.35472	0.381948	1.8	1.90115
210017	1.28507	1.16195	0.12312	3.2	2.94759
210706	1.34501	1.17066	0.174353	4	4.60159
Renaissance	1.81678	1.72632	0.0904619	2.8	4.14869
Dahli	1.74794	1.43817	0.345715	2	2.82527
Malling-champion	1.54448	1.29175	0.252734	1.4	2.07296
201409	1.32601	1.16742	0.21476	0.7	1.78863
Lola	1.97819	1.51975	0.458438	0.8	1.38151
190349	2.20035	1.51135	0.688999	1.5	2.52246
201419	2.96728	1.91154	1.05574	2.8	5.07585
Asia	2.00462	1.39818	0.606439	1.4	2.71648
201438	2.18982	1.64381	0.531509	2.3	3.48308
190128	1.66151	1.39916	0.213761	2.9	4.08513
Clery	1.55978	1.23411	0.325669	1.4	1.45978
Florentina	1.73358	1.33851	0.395067	0.7	0.975381
210706	1.41799	1.06646	0.351536	2.9	3.37291

## Sheet: Table 7
genotype	strain (%)		Cultivar	CM (g/m2)		cultivar	infiltrated area (%)		genotype	permeance x 10^-6(m/s)	WS at 4h (rating)
190128	34.1128		190349	0.477465		190349	0		190128	3.99147	3
	20.1374		190349	0.525211		190349	0		190128	5.61527	4
	22.5987		190349	0.461549		190349	2.33405		190128	6.23047	3
	19.4522		190349	0.49338		190349	1.25297		190128	2.69788	2
	26.5496		190349	0.429718		190349	5.03676		190128	1.726	1
	37.4876		190349	0.652535		190349	29.0908		190128	3.32041	4
	45.7816		190349	0.477465		190349	14.2259		190128	4.08338	3
	43.78		190349	0.557042		190349	27.7395		190128	5.80567	3
	14.136		190349	0.652535		190349	2.60432		190128	3.42743	3
	29.5502		Lola	0.397887		190349	2.06378		190128	3.95329	3
190349	41.354		Lola	0.509296		190349	0.712432		190349	3.65224	2
	30.6276		Lola	0.541127		190349	5.84757		190349	2.53968	2
	38.8549		Lola	0.827606		190349	0.171892		190349	2.92943	2
	52.8756		Lola	0.461549		190349	8.00973		190349	0.958971	1
	49.5997		Lola	0.413803		190349	15.8476		190349	1.03802	0
	32.9775		Lola	0.49338		190349	1.79351		190349	3.82052	2
	51.9513		Lola	0.49338		190349	17.4692		190349	3.99134	2
	50.4955		Lola	0.429718		190349	0.442162		190349	1.34492	1
	56.104		Lola	0.445634		190349	1.52324		190349	2.24089	1
	52.3196		210706	0.525211		190349	7.73946		190349	2.70858	2
201409	47.1472		210706	0.525211		201409	4.76649		201409	1.50684	1
	54.1886		210706	0.557042		201409	8.82054		201409	2.10845	1
	48.7144		210706	0.604789		201409	10.1719		201409	1.92101	1
	33.2595		210706	0.620704		201409	0.442162		201409	2.14573	1
	35.9997		210706	0.604789		201409	7.19892		201409	1.51028	1
	44.7739		210706	0.509296		201409	0.442162		201409	1.78107	0
	36.8886		210706	0.63662		201409	0.712432		201409	1.31691	0
	37.6382		210706	0.620704		201409	9.90162		201409	1.64645	0
	40.0933		210706	0.509296		201409	7.73946		201409	2.26844	1
	49.9567		201438	0.525211		201409	3.95568		201409	1.68112	1
201419	55.9103		201438	0.477465		201409	0.712432		201419	5.41101	3
	34.2561		201438	0.413803		201409	25.8476		201419	6.12875	3
	37.6382		201438	0.397887		201409	4.76649		201419	4.97828	3
	60.49		201438	0.413803		201409	4.76649		201419	4.22513	3
	36.7396		201438	0.541127		201409	2.06378		201419	5.61603	2
	34.9771		201438	0.509296		201409	4.22595		201419	3.33469	2
	45.6126		201419	0.461549		201409	5.30703		201419	4.91372	4
	36.2947		201419	0.541127		201409	3.14486		201419	6.22121	3
	44.7739		201419	0.429718		201409	12.0638		201419	5.85531	3
	30.7635		201419	0.445634		201409	4.49622		201419	4.07434	2
201438	28.622		201419	0.795775		210706	15.943		201438	1.60598	2
	29.6839		201419	0.732113		210706	27.6278		201438	4.07838	2
	36.591		201419	0.732113		210706	12.4104		201438	2.62497	1
	34.2561		201419	0.49338		210706	16.2148		201438	3.0826	2
	27.448		201419	0.541127		210706	4.25826		201438	3.44302	3
	65.7833		201419	0.732113		210706	8.87783		201438	4.13401	3
	41.354		Clery	0.413803		210706	13.7691		201438	4.09187	3
	25.1631		Clery	0.461549		210706	13.7691		201438	5.61646	3
	35.8527		Clery	0.541127		210706	1.26913		201438	3.34558	2
	33.9698		Clery	0.49338		210706	40.6713		201438	2.80791	2
210706	47.8397		Clery	0.509296		210706	65.943		210706	4.72414	4
	31.4474		Clery	0.49338		210706	13.4974		210706	1.97145	2
	25.4129		Clery	0.413803		210706	5.34522		210706	4.33997	3
	39.1625		Clery	0.445634		210706	1.54087		210706	2.25051	3
	43.9447		Clery	0.572958		210706	38.2257		210706	1.58071	1
	42.1535		201409	0.525211		210706	7.79087		210706	3.42862	3
	33.9698		201409	0.557042		210706	8.60609		210706	3.04178	2
	24.1736		201409	0.366056		210706	37.6822		210706	4.89561	4
	19.2255		201409	0.525211		210706	15.6713		210706	3.9144	4
	28.7538		201409	0.541127		210706	23.5517		210706	3.58187	3
Asia	56.8835		201409	0.525211		lola	8.82054		Asia	2.77966	1
	32.1385		201409	0.429718		lola	0		Asia	2.96769	2
	27.448		201409	0.413803		lola	1.25297		Asia	3.51267	2
	29.2836		201409	0.413803		lola	1.79351		Asia	2.71694	2
	8.14433		201409	0.49338		lola	0		Asia	2.72135	1
	33.2595		Florentina	0.49338		lola	0.712432		Asia	2.27517	1
	20.5986		Florentina	0.63662		lola	0		Asia	3.09142	1
	36.2947		Florentina	0.541127		lola	0		Asia	1.98962	1
	35.1223		Florentina	0.509296		lola	0.171892		Asia	1.89981	1
	38.2439		Florentina	0.413803		lola	2.33405		Asia	3.21052	2
Clery	41.1952		Florentina	0.716197		lola	0.171892		Clery	1.09548	1
	52.1352		Florentina	0.509296		lola	0		Clery	0.46185	1
	48.3633		Florentina	0.381972		lola	0.171892		Clery	2.94614	2
	69.8158		Florentina	0.477465		lola	0.712432		Clery	0.76121	1
	16.1402		Asia	0.588873		lola	0.712432		Clery	0.663899	1
	42.7997		Asia	0.572958		lola	9.90162		Clery	1.65106	1
	32.417		Asia	0.588873		lola	0		Clery	0.681749	1
	15.7124		Asia	0.620704		lola	0.712432		Clery	3.65389	3
	29.8179		Asia	0.509296		lola	0.982703		Clery	2.04089	2
	23.079		Asia	0.525211					Clery	0.641661	1
Florentina	23.1997		Asia	0.604789					Florentina	0.718396	0
	15.0767		Asia	0.572958					Florentina	1.10458	1
	14.6567		Asia	0.541127					Florentina	1.13524	1
	32.1385		Asia	0.557042					Florentina	0.916965	1
	22.0036		190128	0.763944					Florentina	0.687312	0
	35.2677		190128	0.859437					Florentina	0.389391	1
	21.4142		190128	0.604789					Florentina	0.702618	0
	12.3		190128	0.620704					Florentina	1.77888	1
	44.6073		190128	0.525211					Florentina	1.24137	1
	35.1223		190128	0.461549					Florentina	1.07905	1
Lola	17.0053		190128	0.588873					Lola	1.2917	0
	17.9941		190128	0.525211					Lola	1.05254	1
	15.7124		190128	0.572958					Lola	1.92804	1
	18.9997		190128	0.525211					Lola	1.2622	1
	20.8305								Lola	1.5195	1
	48.0138								Lola	1.2842	1
	44.9408								Lola	1.19226	1
	31.173								Lola	1.22948	0
	39.7817								Lola	1.39047	1
	31.4474								Lola	1.66473	1
190243	30.6276
	15.9259
	25.0385
	26.933
	21.8853

[truncated: 6 more sheets: Table 8, S2, S3, S4, S6, S7]
